# Supplementary material for: Broad-spectrum pharmacological activity of Australian propolis and metabolomic-driven identification of marker metabolites of propolis samples from three continents
Source: Royal Society of Chemistry journal article supplement (doi:10.1039/d1fo00127b), 2021-01-01
Supplement: d1fo00127b1.pdf [file d1fo00127b1.pdf]

Supplementary File 1

## Broad-spectrum pharmacological activity of Australian propolis and metabolomic-driven identification of marker metabolites of propolis samples from three continents

### Table of Contents

|                                                                                                                                                                                                        |    |
|--------------------------------------------------------------------------------------------------------------------------------------------------------------------------------------------------------|----|
| Figure S1: UPLCMS OPLS-DA analysis of AP-1 against the AP-2; Kangaroo island, Brazilian and Chinese samples, A) score scatter plot B) loading scatter S-plot (# Hydroxymangiferolic acid isomers)..... | 4  |
| Figure S2: UPLCMS OPLS-DA analysis of Kangaroo island propolis samples against the AP-1, Brazilian and Chinese samples, A) score scatter plot B) loading scatter S-plot.....                           | 4  |
| Figure S3 3.00_515.1200m/z (Di-O-caffeoylquinic acid).....                                                                                                                                             | 5  |
| Figure S4 3.27_327.1215m/z (3,4-dihydroxy-2-(4-hydroxy-3,7-dimethylocta-2,6-dien-1-yl)benzoic acid).....                                                                                               | 5  |
| Figure S5 3.33_357.1320m/z (Butyl 3-O-beta-D-glucopyranosyl-butanoate).....                                                                                                                            | 6  |
| Figure S6 3.36_678.1593n (Tri-O-caffeoylquinic acid).....                                                                                                                                              | 6  |
| Figure S7 3.47_375.1429m/z ((7S,8S,7'R,8'R)-3,3',4'-trihydroxy-4-methoxy-7,7'-epoxylignan).....                                                                                                        | 7  |
| Figure S7 3.59_360.1532n (Casegravol isovaleric acid).....                                                                                                                                             | 7  |
| Figure S8 4.09_440.1799n (Abyssinoflavanone VI).....                                                                                                                                                   | 7  |
| Figure S9 4.19_301.0699m/z (Dihydrokaempferide).....                                                                                                                                                   | 8  |
| Figure S10 4.22_311.1258m/z (3',4',5-trihydroxy-3-prenyloxy-(E)-stilbene).....                                                                                                                         | 8  |
| Figure S11 4.47_358.1387n pinoresinol (lignan).....                                                                                                                                                    | 9  |
| Figure S12 4.48_315.0846m/z (Cyclocalopin F).....                                                                                                                                                      | 9  |
| Figure S13 4.66_380.1964n ( (E)-2,4-bis(3-methyl-2-buten-1-yl)-3,3',4',5-tetrahydroxystilbene).....                                                                                                    | 10 |
| Figure S14 4.68_270.1595n (3β-hydroxy-estra-5,7,9-trien-17-one).....                                                                                                                                   | 11 |
| Figure S15 4.76_669.2691m/z (Coagulin R –hexoside).....                                                                                                                                                | 12 |
| Figure S16 4.87_478.1247n (5-hydroxy-3-(4-hydroxy-3,5-dimethoxy-benzoyl)-2-(3-hydroxy-4-methoxy-phenyl)-6-methoxy-inden-1-one).....                                                                    | 13 |
| Figure S17 5.06_314.1502n (Gibberellin A120).....                                                                                                                                                      | 14 |

|                                                                                                                                    |    |
|------------------------------------------------------------------------------------------------------------------------------------|----|
| Figure S18 5.06_357.1308m/z (3,5,3',4'-Tetrahydroxy-2-prenyl-(E)-stilbene) .....                                                   | 14 |
| Figure S19 5.09_394.1390n ((E)-3-{2,3-dihydro-2[2-[(E)-p-coumaroyloxy]-1-methylethyl]-5-benzofuranyl}-2-propenoic acid) .....      | 15 |
| Figure S20 5.13_270.0494n Trihydroxy flavone (Apigenin/Galangin).....                                                              | 16 |
| Figure S21 5.52_315.1573m/z ((E)-3-(2,3-dihydro-2-(1-hydroxy-1-methylethenyl)-7-prenyl-5-benzofuranyl]-2-propenoic acid).....      | 16 |
| Figure S22 5.95_380.1945n ((E)-2,6-bis(3-methyl-2-buten-1-yl)-3,3',5,5'-tetrahydroxystilbene) .....                                | 17 |
| Figure S23 5.96_342.1442n (Prenyl-tetrahydroxy-dihydrochalcone) .....                                                              | 18 |
| Figure S24 6.15_490.3635n (Barringtonol C-like) .....                                                                              | 18 |
| Figure S25 6.34_299.1630m/z (ArtepillinC).....                                                                                     | 18 |
| Figure S26 6.46_489.3562m/z (6beta-acetoxy-24-methylcholestan-3beta,5alpha,22R,24-tetrol) .....                                    | 19 |
| Figure S27 6.59_344.2306n (Methyl 4,6-O-(10-undecenylidene)hexopyranoside) .....                                                   | 20 |
| Figure S28 6.94_424.1860n (Propolin C/D/F) .....                                                                                   | 20 |
| Figure S29 6.94_720.3287n isomer of 6.62_720.3285n.....                                                                            | 21 |
| Figure S30 6.98_408.1906n (3',8-diprenylnaringenin) .....                                                                          | 22 |
| Figure S31 7.12_334.2115n (Agathic acid).....                                                                                      | 23 |
| Figure S32 7.37_337.1057m/z (pinobanksin-3-pentanoate).....                                                                        | 23 |
| Figure S33 6.92_355.1185m/z pinobanksin 3-pentanoate.....                                                                          | 23 |
| Figure S34 7.43_369.1107m/z (6-cinnamylchrysin) .....                                                                              | 24 |
| Figure S35 7.45_385.1056m/z (Dimethoxy-6",6"-dimethylpyranoflavone).....                                                           | 24 |
| Figure S36 7.57_385.1061m/z (Gibberellin A29/A1/A34/A36/A58/A60) .....                                                             | 24 |
| Figure S37 7.76_407.1835m/z (8-geranyl naringenin(bonannione A,sophoraflavanone A)).....                                           | 25 |
| Figure S38 8.96_471.3450m/z (hydroxymangiferolic acid/hydroxyisomangiferolic acid (3,23-Dihydroxycycloart-24-en-26-oic acid))..... | 25 |
| Figure S39 8.96_471.3458m/z (hydroxymangiferolic acid/hydroxyisomangiferolic acid (3,23-Dihydroxycycloart-24-en-26-oic acid))..... | 26 |
| Figure S40 9.21_471.3448m/z (hydroxymangiferolic acid/hydroxyisomangiferolic acid (3,23-Dihydroxycycloart-24-en-26-oic acid))..... | 26 |
| Figure S41 9.04_491.2414m/z (Propolin G/Solophenol A/Nymphaeol C (Geranyl-tetrahydroxy-prenylflavanone)) .....                     | 27 |

|                                                                                                                                  |    |
|----------------------------------------------------------------------------------------------------------------------------------|----|
| Figure S42 9.21_492.2487n (Propolin G/Solophenol A/Nymphaeol C (Geranyl-tetrahydroxy-prenylflavanone)) .....                     | 27 |
| Figure S43 9.50_613.3172m/z (Spirostenyl-hexoside) .....                                                                         | 28 |
| Figure S44 9.51_496.3161n (PG(P-18:0/0:0)) .....                                                                                 | 28 |
| Figure S45 9.68_512.3120n (PG(18:0/0:0)).....                                                                                    | 28 |
| Figure S46 9.69_455.3493m/z (Mangiferolic acid/isomangiferolic acid/12-Hydroxy-3,4-secocycloarta-4(28),24-dien-3-oic acid) ..... | 29 |
| Figure S47 10.10_525.3209m/z (GPC(20:4)) .....                                                                                   | 30 |
| Figure S48 10.38_514.3308n (Spirost-5-en-3,11-diyl diacetate) .....                                                              | 31 |
| Figure S49 10.65_528.3449n ((24E)-3alpha-Acetoxy-15alpha,22S-dihydroxylanosta-7,9(11),24-trien-26-oic acid).....                 | 32 |
| Table S1 UPLC-DAD quantified phenolics in propolis samples (Mean ±SD).....                                                       | 33 |
| Figure S50. The abundance of Artepillin C among propolis samples (UPLC-qTOF-MS).....                                             | 35 |
| References.....                                                                                                                  | 35 |

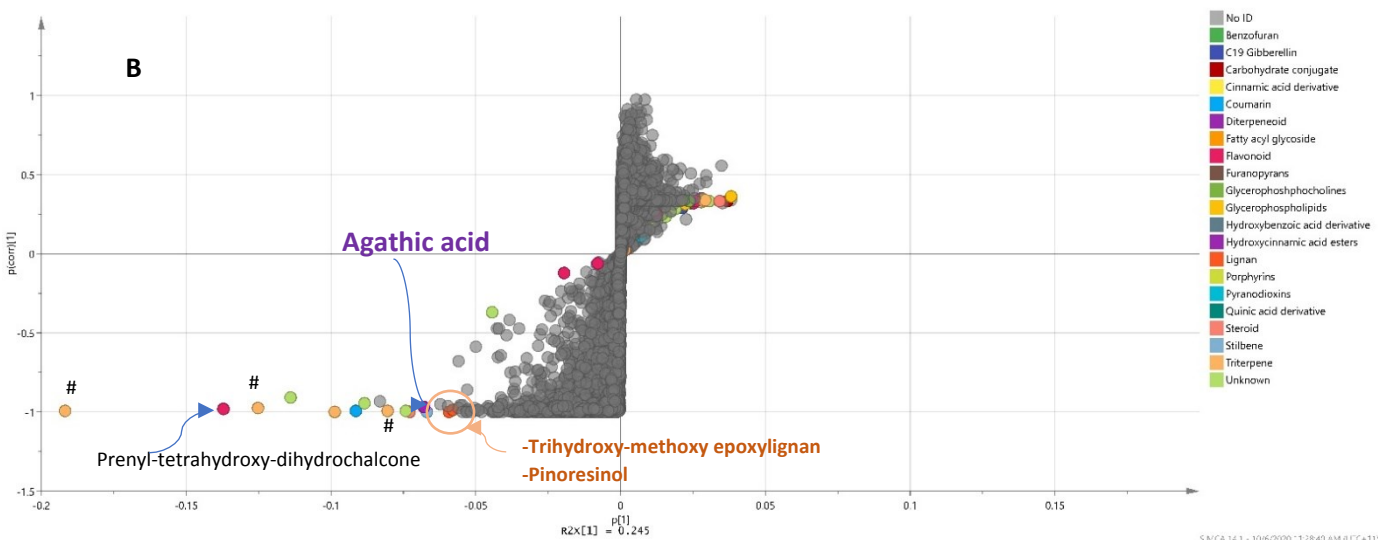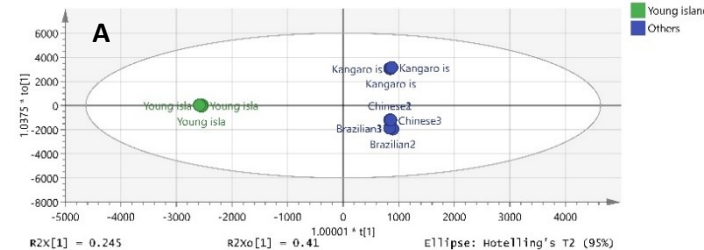

**Figure S1: UPLCMS OPLS-DA analysis of AP-1 against the AP-2; Kangaroo island, Brazilian and Chinese samples, A) score scatter plot B) loading scatter S-plot (# Hydroxymangiferolic acid isomers).**

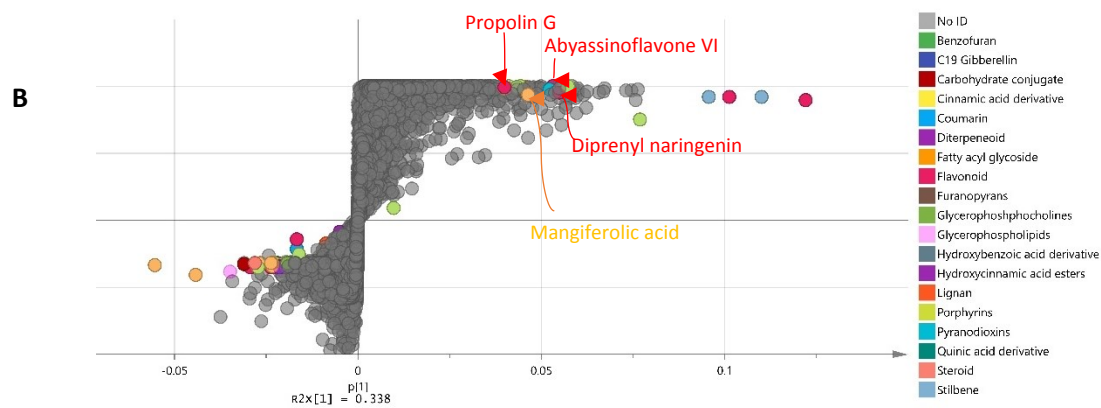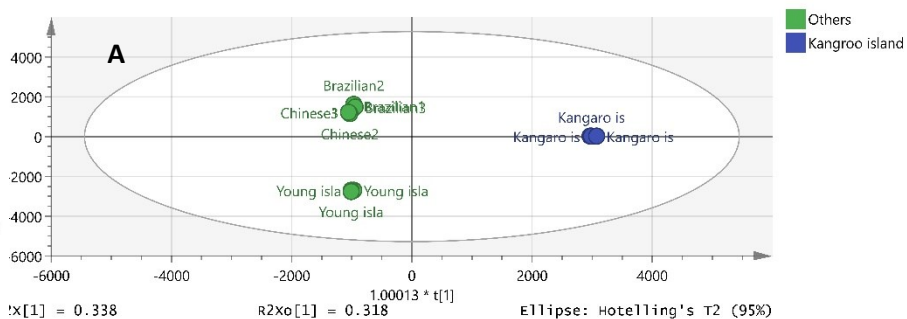

**Figure S2: UPLCMS OPLS-DA analysis of Kangaroo island propolis samples against the AP-1, Brazilian and Chinese samples, A) score scatter plot B) loading scatter S-plot**

**Figure S3 3.00\_515.1200m/z (Di-O-caffeoylquinic acid)**

**Compound 3.00\_515.1200m/z (Dicafeoylquinic ac**

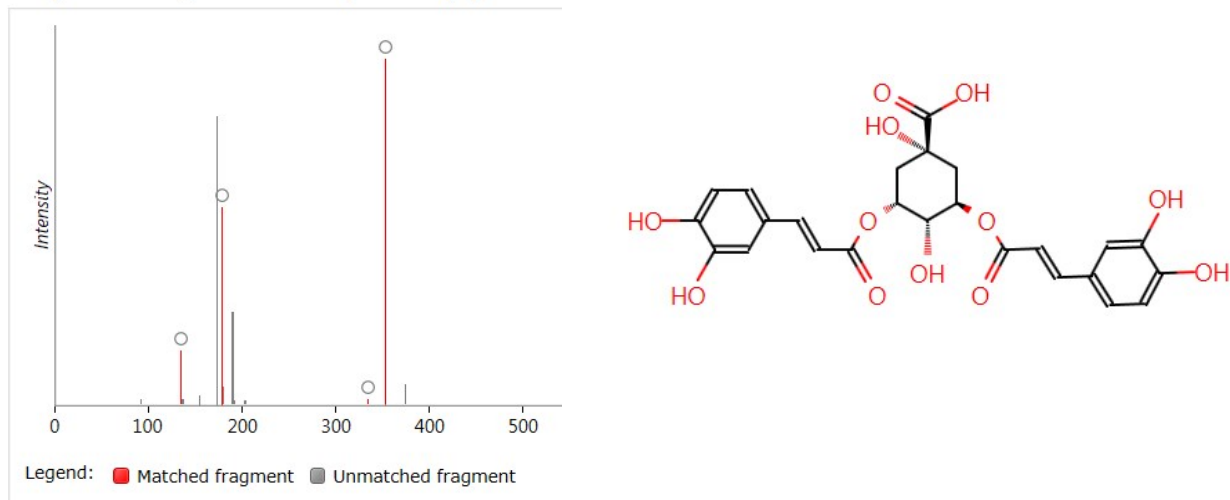

(TATEFUJI, IZUMI et al. 1996)

**Figure S4 3.27\_327.1215m/z (3,4-dihydroxy-2-(4-hydroxy-3,7-dimethylocta-2,6-dien-1-yl)benzoic acid)**

**Compound 3.27\_327.1215m/z (3,4-dihydroxy-2-(4-hydroxy-3,7-dimethylocta-2,6-dien-1-yl)benzoic acid)**

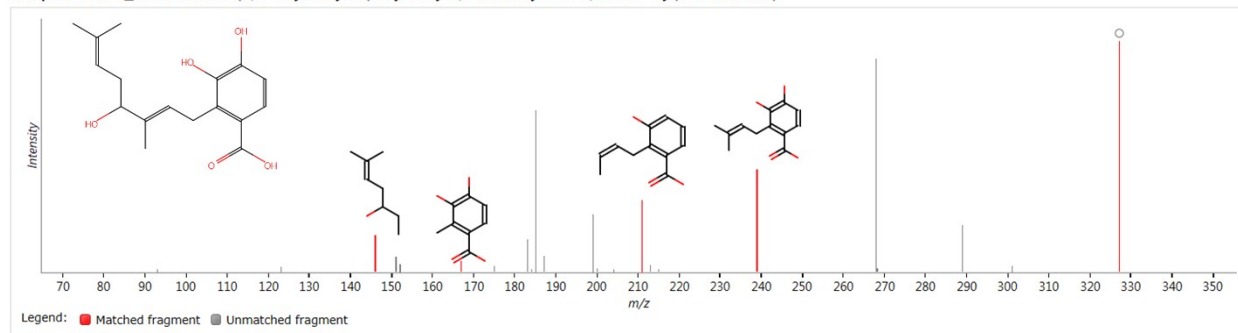

**Figure S5 3.33\_357.1320m/z (Butyl 3-O-beta-D-glucopyranosyl-butanoate)**

Compound 3.33\_357.1320m/z (Butyl 3-O-beta-D-glucopyranosyl-butanoate)

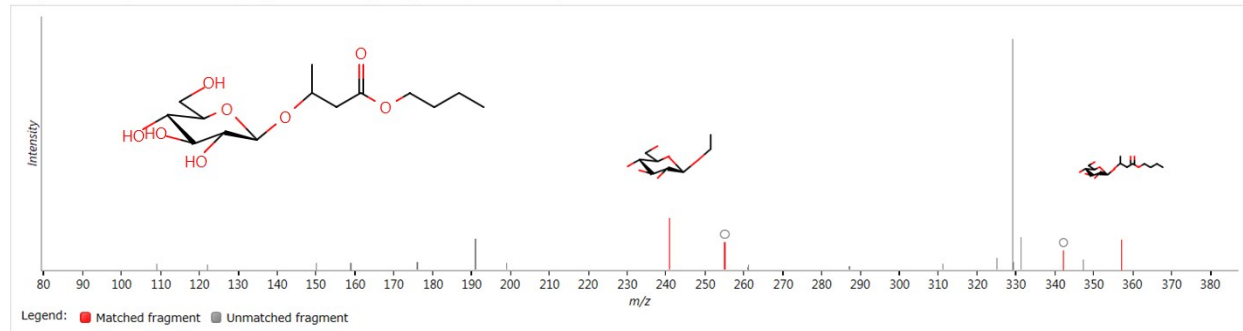

**Figure S6 3.36\_678.1593n (Tri-O-caffeoylquinic acid)**

3,4,5-Tri-*O*-caffeoylquinic acid (Matsui, Ebuchi et al. 2004, Mishima, Inoh et al. 2005, Nakajima, Shimazawa et al. 2007)

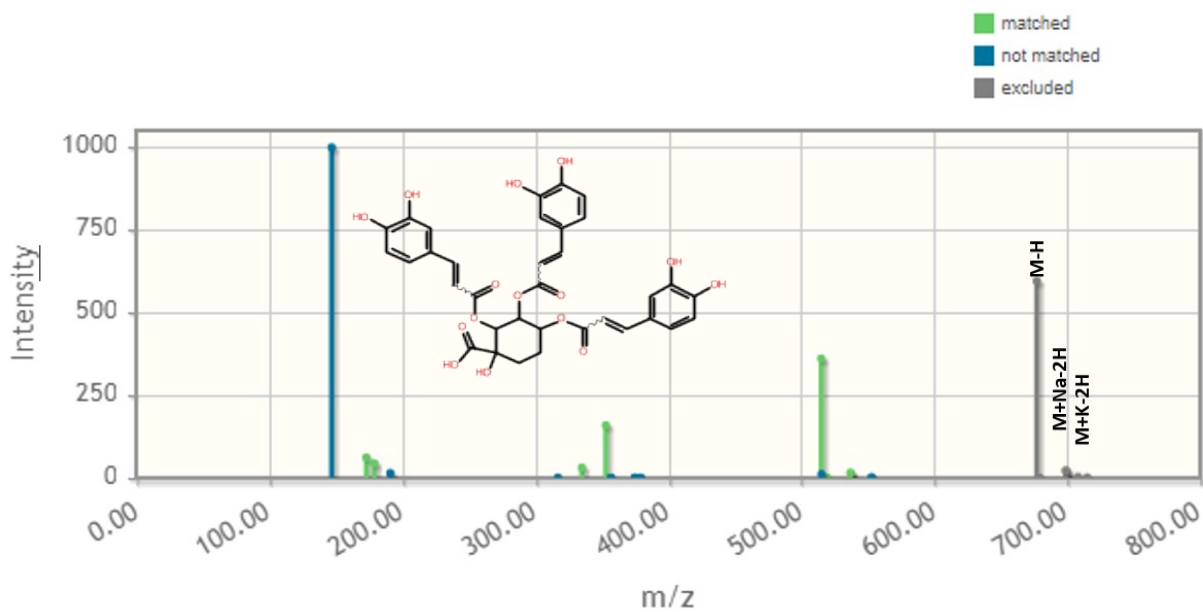

**Figure S7 3.47\_375.1429m/z ((7S,8S,7'R,8'R)-3,3',4'-trihydroxy-4-methoxy-7,7'-epoxylignan)**

(Aguero, Svetaz et al. 2011)

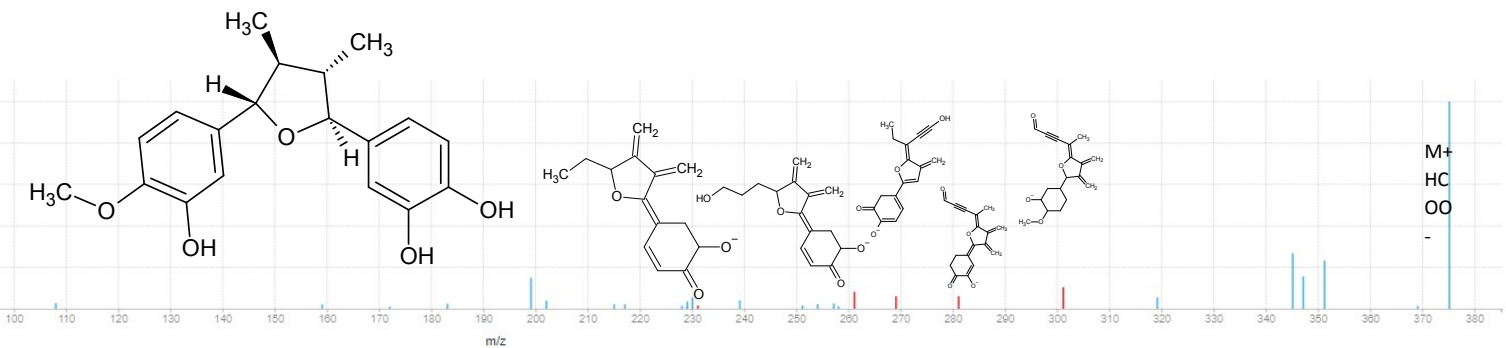

\*Matched fragments colored red

**Figure S7 3.59\_360.1532n (Casegravol isovaleric acid)**

CC(C)CC(=O)OCC(C)(C=CC1=C(C=CC2=C1OC(=O)C=C2)OC)O

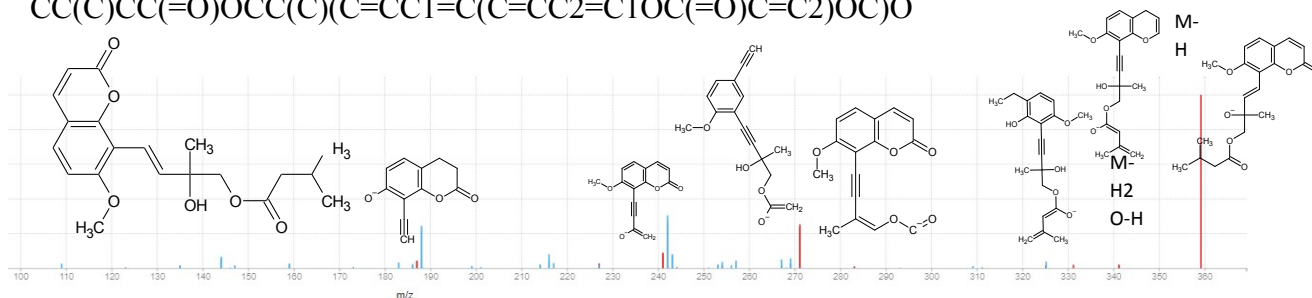

\*Matched fragments colored red

**Figure S8 4.09\_440.1799n (Abyssinoflavanone VI)**

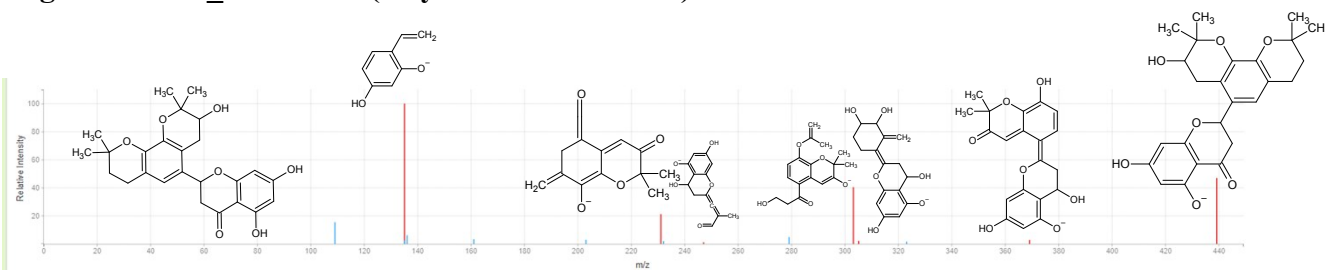

\*Matched fragments colored red

**Figure S9 4.19\_301.0699m/z (Dihydrokaempferide)**

(Banskota, Tezuka et al. 1998)

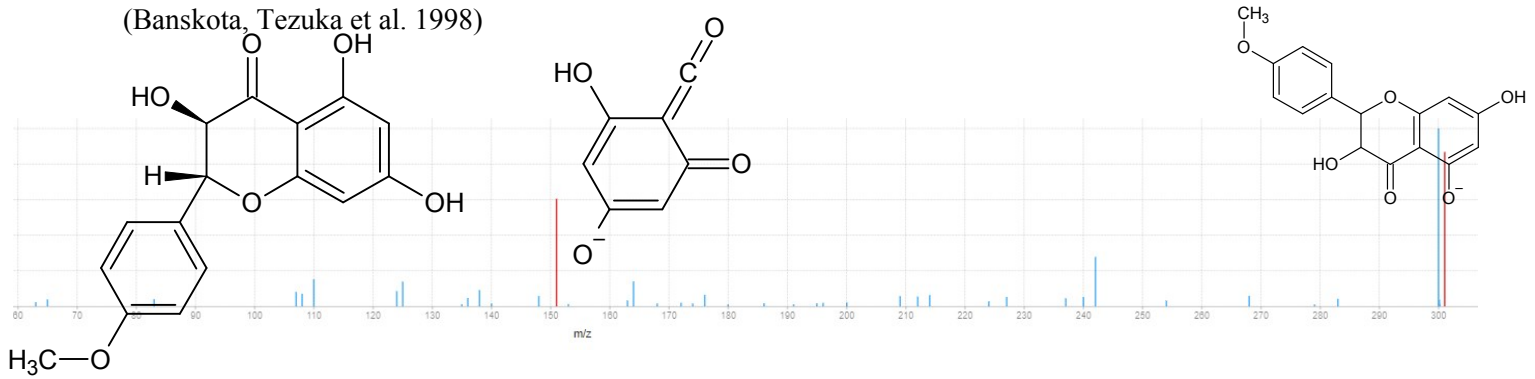

**Figure S10 4.22\_311.1258m/z (3',4',5-trihydroxy-3-prenyloxy-(E)-stilbene)**

(Abu-Mellal, Koolaji et al. 2012)

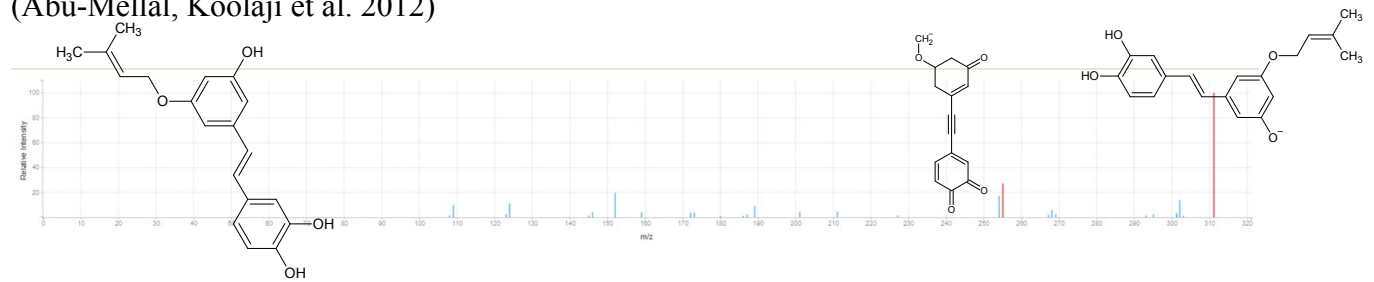

**LogP4.4 (eluted first)**

**5.06\_357.1308m/z (tetrahydroxy-prenyl-stilbene)**

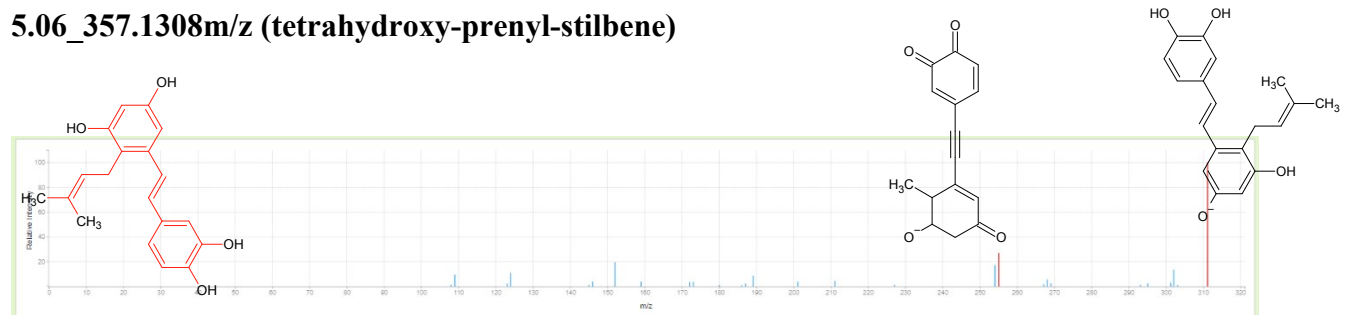

**Compound 60:**

LogP4.5 (more lipophilic → 5.06\_357.1308m/z)

\*Matched fragments colored red



### Figure S11 4.47\_358.1387n pinoresinol (lignan)

(Li, Awale et al. 2008)

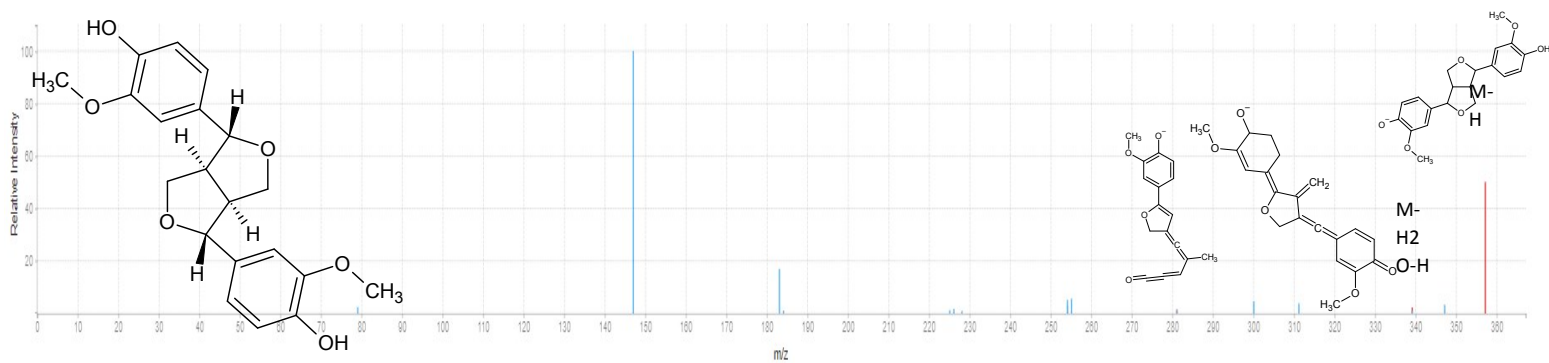

\*Matched fragments colored red

### Figure S12 4.48\_315.0846m/z (Cyclocalopin F)

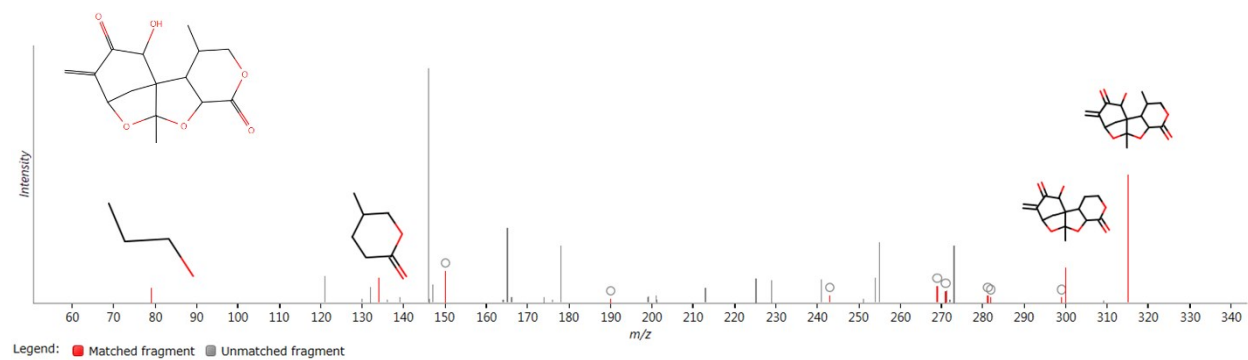

Figure S13 4.66\_380.1964n ( (E)-2,4-bis(3-methyl-2-buten-1-yl)-3,3',4',5-tetrahydroxystilbene)

(Duke, Tran et al. 2017)

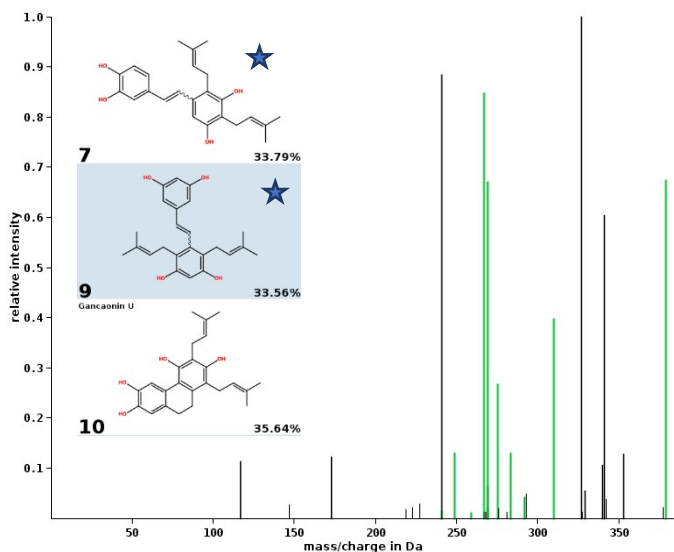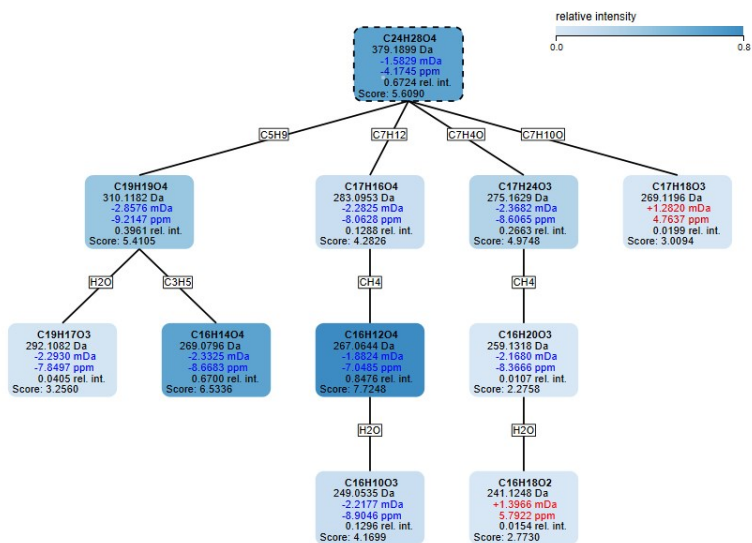

\*Matched fragments coloured green

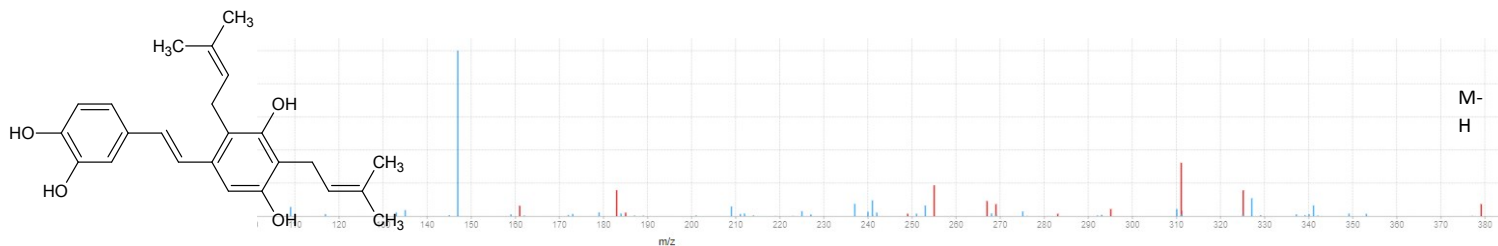

\*Matched fragments colored red

| Fragment m/z | Structure                                                         |
|--------------|-------------------------------------------------------------------|
| 161.023      | <chem>O=C=C=C=C=C=CC([O-])CO</chem>                               |
| 183.0103     | <chem>O=C=C=C=C=C=C1C=CC(=O)C([O-])=C1</chem>                     |
| 185.0591     | <chem>CC=CC#CC=C1C=CC(=O)C([O-])=C1</chem>                        |
| 241.1248     | <chem>[CH-]=C(C#CC1=CC(=O)C(=O)C=C1)CCCC(C)C</chem>               |
| 249.0535     | <chem>CC[CH-]C#CC(C#CC1=CC(=O)C(=O)C=C1)=C=C=O</chem>             |
| 255.0645     | <chem>CC1C(=O)C=C([O-])C=C1C#CC1=CC(=O)C(=O)CC1</chem>            |
| 259.1318     | <chem>CC(C)CCC1C(=O)C=C([O-])C=C1#CC=CCO</chem>                   |
| 267.0644     | <chem>CCC1C(=O)C=C([O-])C=C1C#CC1=CC(=O)C(=O)C=C1</chem>          |
| 269.0796     | <chem>CCC1C(=O)C=C([O-])C=C1C#CC1=CC(=O)C(=O)CC1</chem>           |
| 269.1196     | <chem>CC(C)CC[CH-]C(C#CC1=CC(=O)C(=O)CC1)=C=C=O</chem>            |
| 283.0953     | <chem>CC(C)CCC1C(=O)C=C([O-])C=C1C#CC#CC(=O)C=O</chem>            |
| 295.1312     | <chem>C=C(C)C#CC1=CCC(C#CC2CCC(O)C([O-])C2)=CC1=O</chem>          |
| 311.1279     | <chem>CC(C)CCC1C(=O)C=C([O-])C=C1C#CC1=CC(=O)C(=O)CC1</chem>      |
| 311.167      | <chem>CC#CC(=O)C=C(C#CC1=CC(=O)C([O-])CC1)CCCC(C)C</chem>         |
| 325.1817     | <chem>CC(C)=C=C=C1C(=O)C=C(C#CCCC([O-])C(CCC(C)C)C1=O</chem>      |
| 379.1899     | <chem>CC(C)=CCc1c(O)cc(C=Cc2ccc(O)c(O)c2)c(CC=C(C)C)c1[O-]</chem> |

Figure S14 4.68\_270.1595n (3 $\beta$ -hydroxy-estra-5,7,9-trien-17-one)

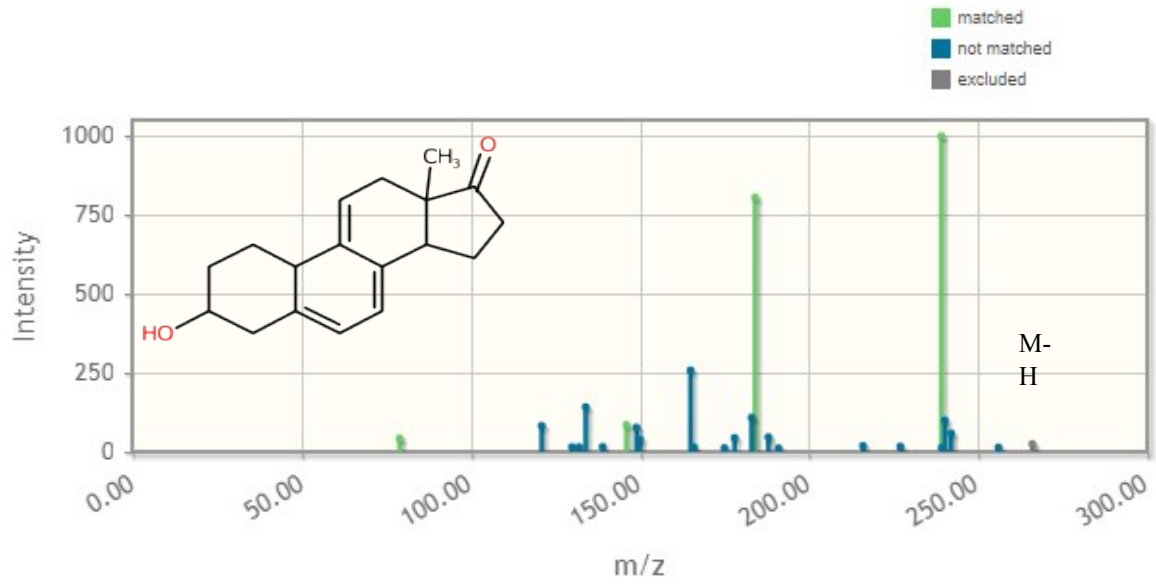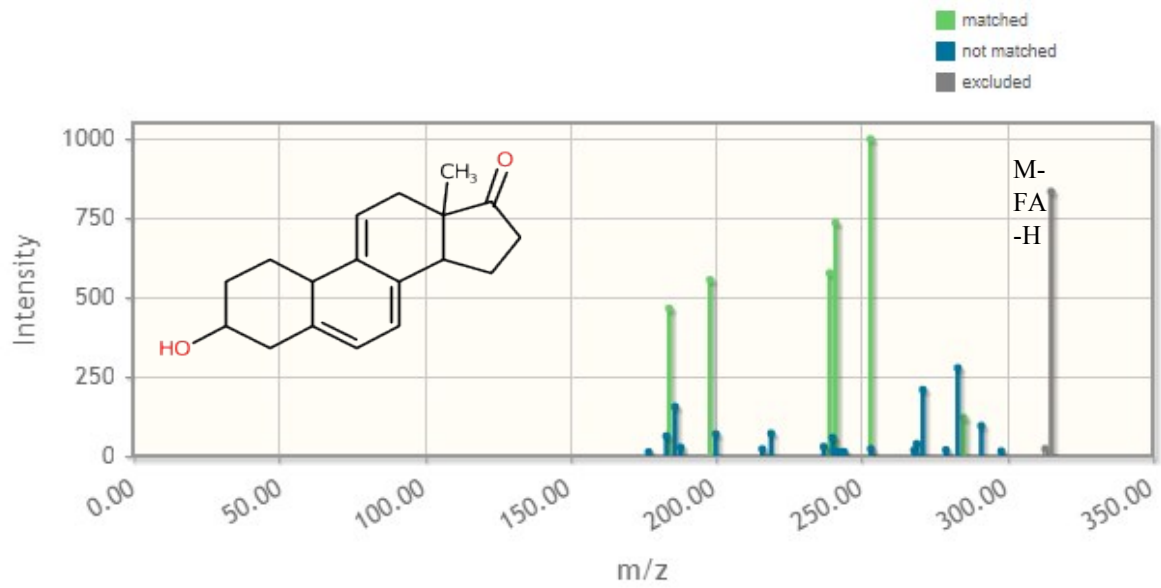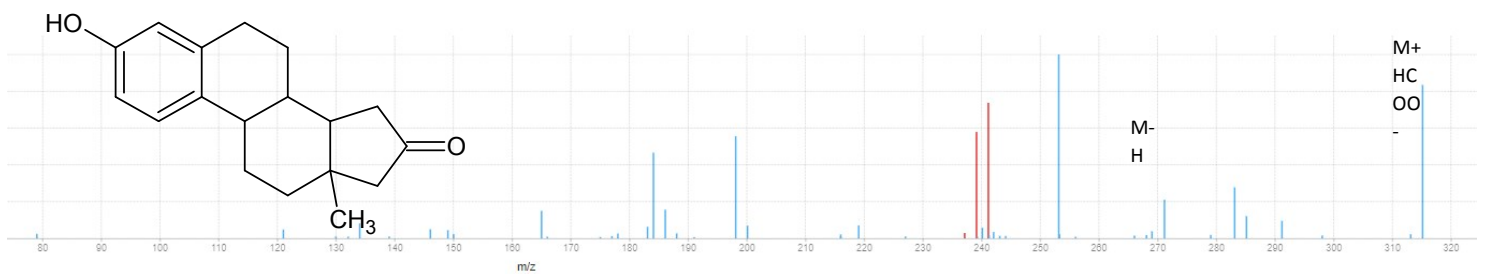

Figure S15 4.76\_669.2691m/z (Coagulin R –hexoside)

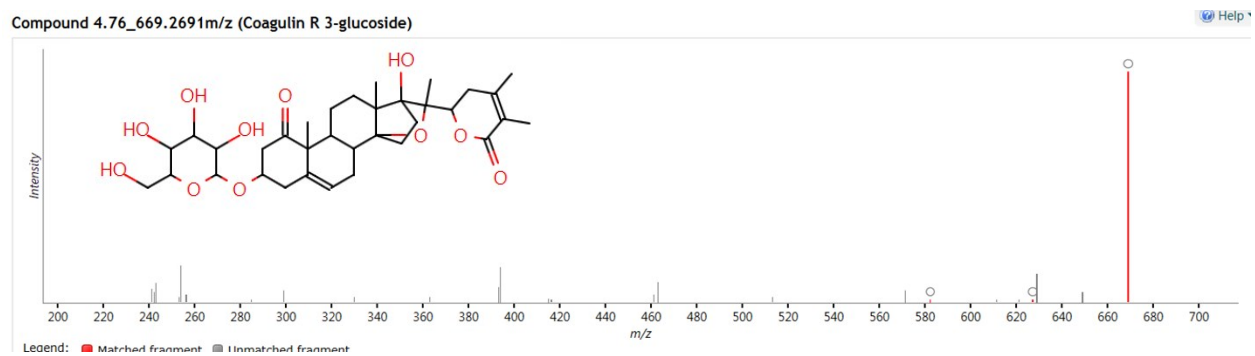

**Figure S16 4.87\_478.1247n (5-hydroxy-3-(4-hydroxy-3,5-dimethoxy-benzoyl)-2-(3-hydroxy-4-methoxy-phenyl)-6-methoxy-inden-1-one)**

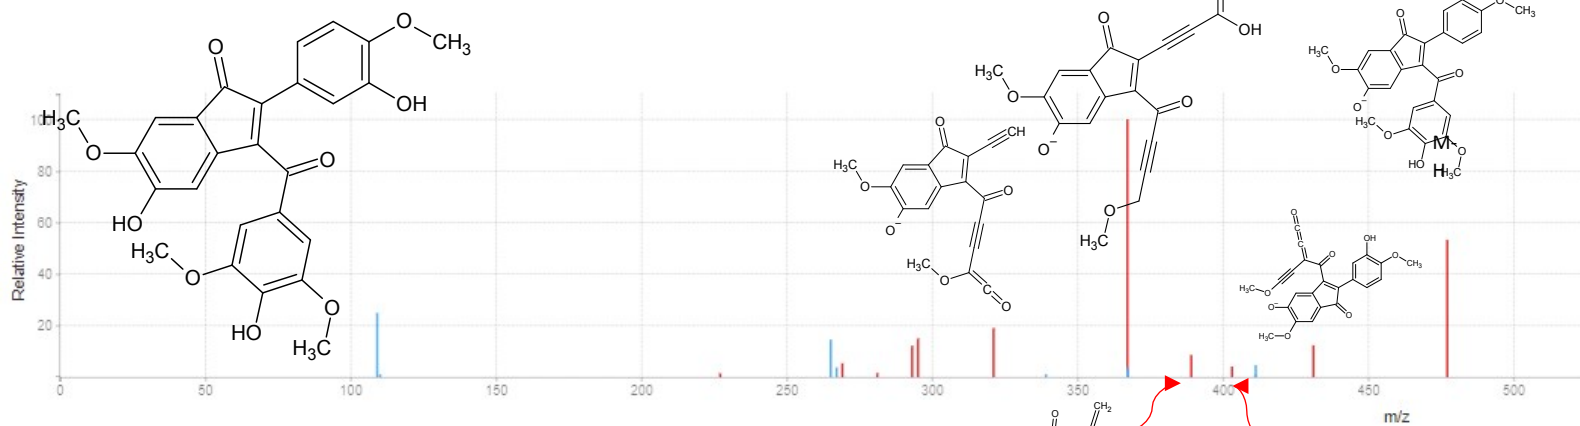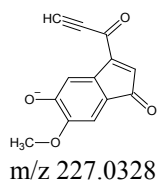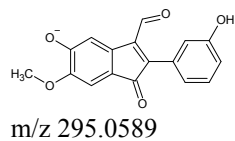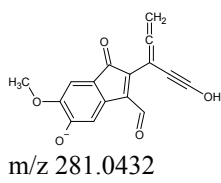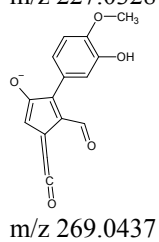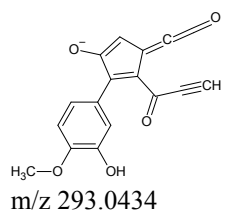

**4.97\_463.1334m/z (Dimeric coniferyl acetate)**  
**(Bankova, Nikolova et al. 1996)**

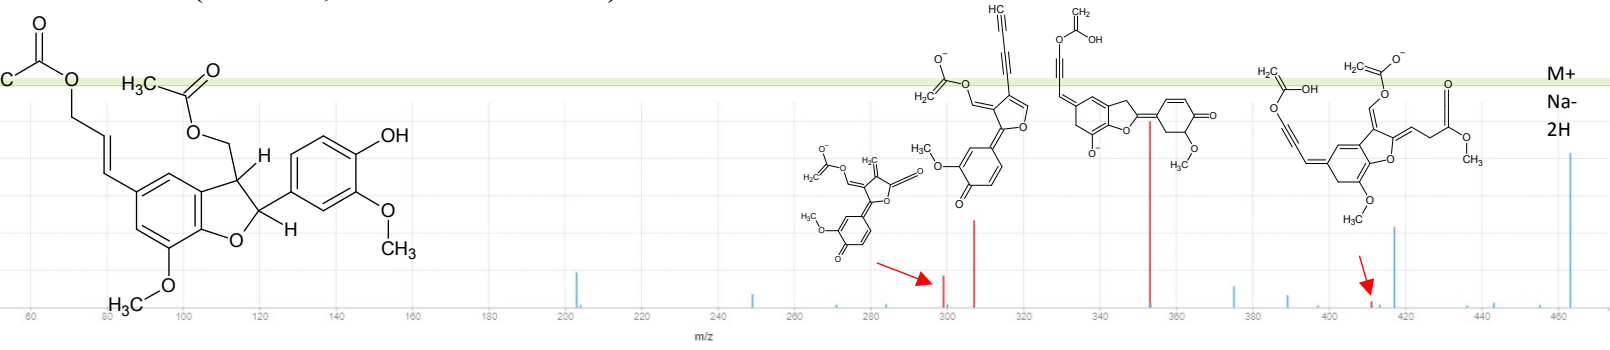

**Figure S17 5.06\_314.1502n (Gibberellin A120)**

(Kim, Kim et al. 2019, Nani, Sardi et al. 2020)

Compound 5.06\_314.1502n (Gibberellin A120)

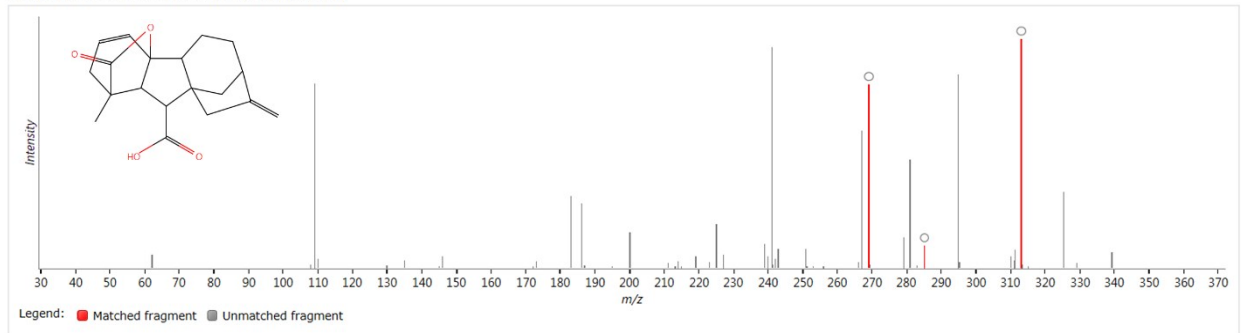

**Figure S18 5.06\_357.1308m/z (3,5,3',4'-Tetrahydroxy-2-prenyl-(E)-stilbene)**

(Abu-Mellal, Koolaji et al. 2012)

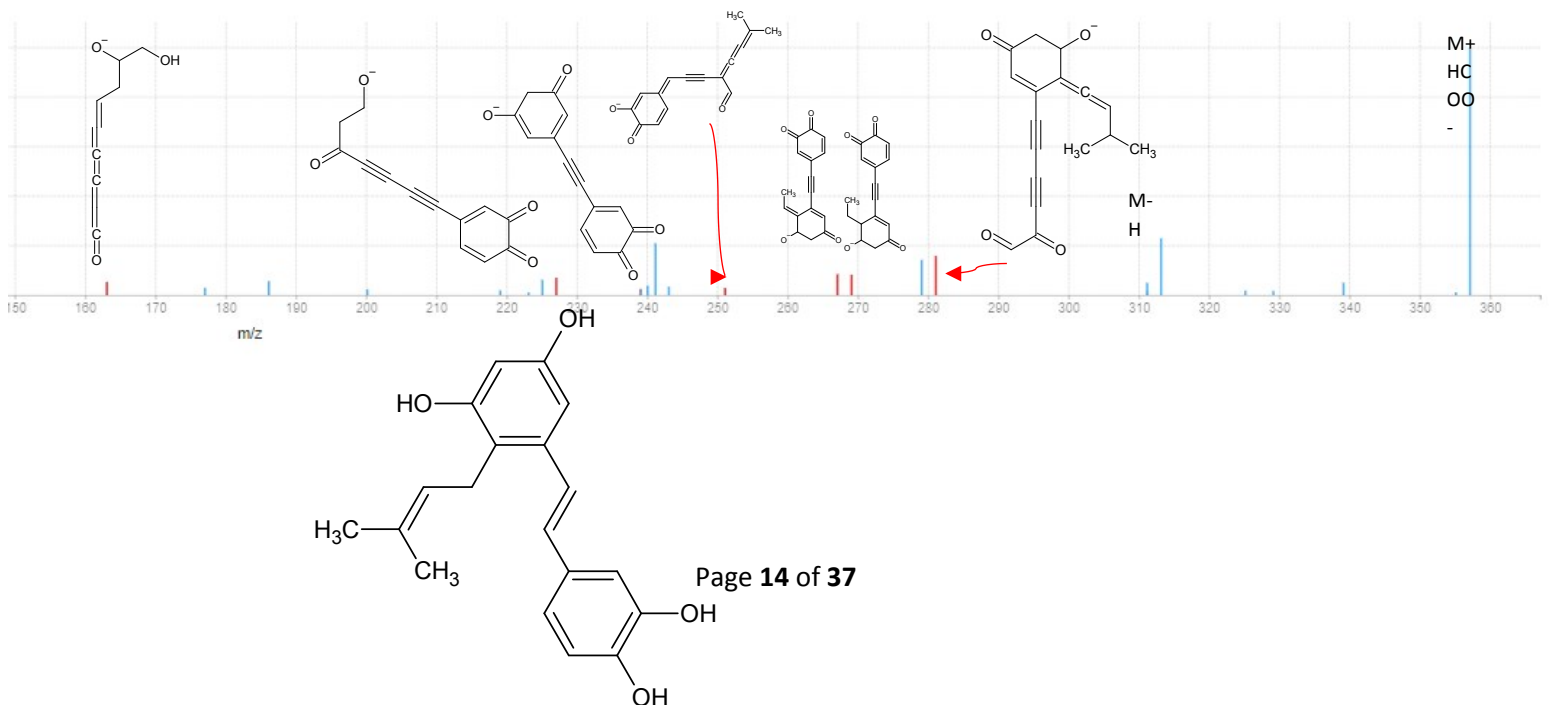

Figure S19 5.09\_394.1390n ((E)-3-{2,3-dihydro-2[2-[(E)-p-coumaroyloxy]-1-methylethyl]-5-benzofuranyl}-2-propenoic acid)  
M-H

(Tazawa, Warashina et al. 1998)

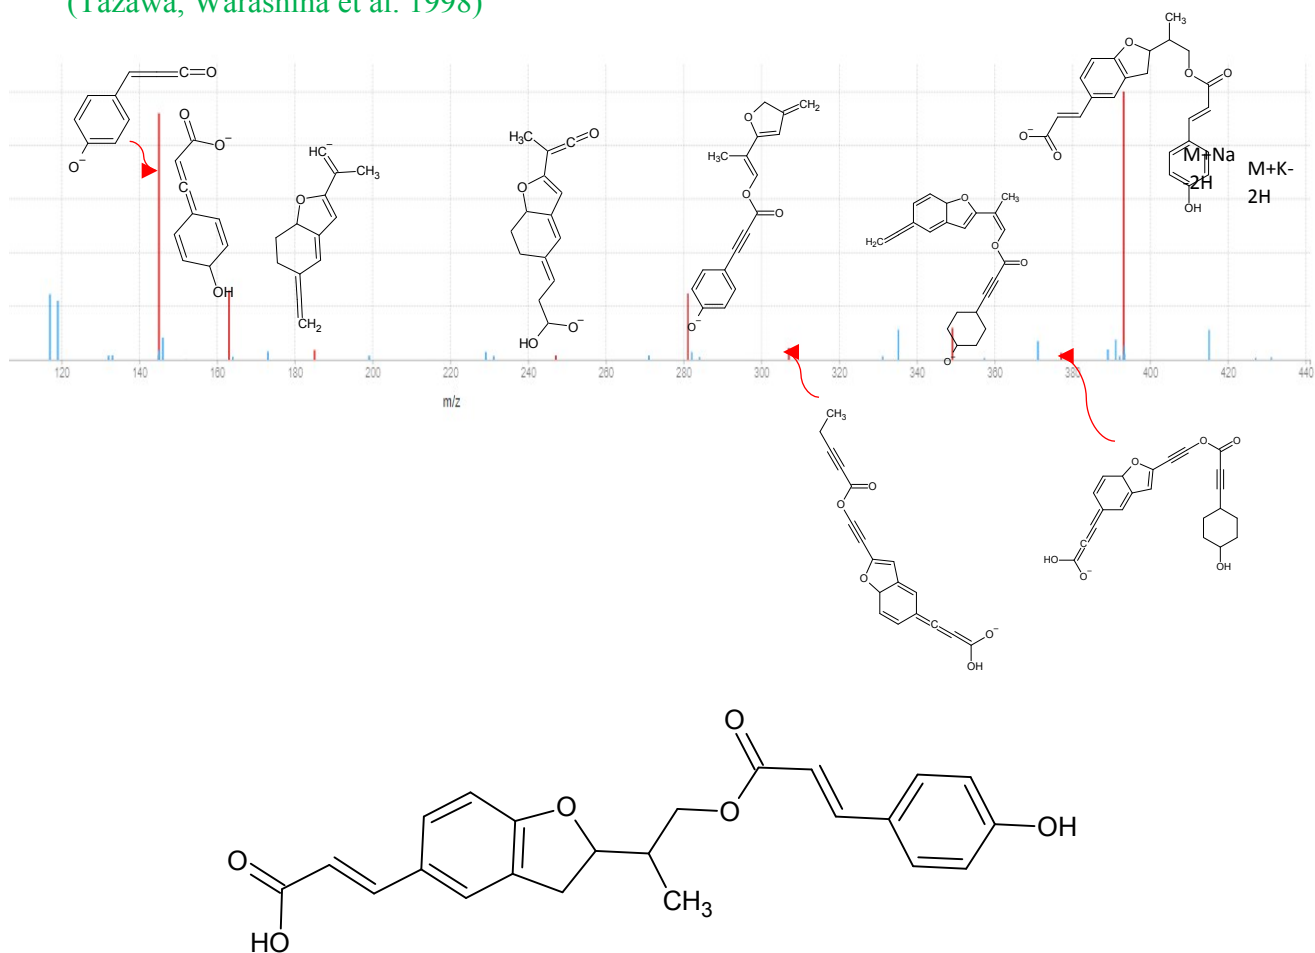

**Figure S20 5.13\_270.0494n Trihydroxy flavone (Apigenin/Galangin)**

(Bankova, Popov et al. 1983, Tazawa, Warashina et al. 1998, Usia, Banskota et al. 2002, Agüero, Gonzalez et al. 2010, Li, Awale et al. 2010, Shaheen, Zarga et al. 2011)

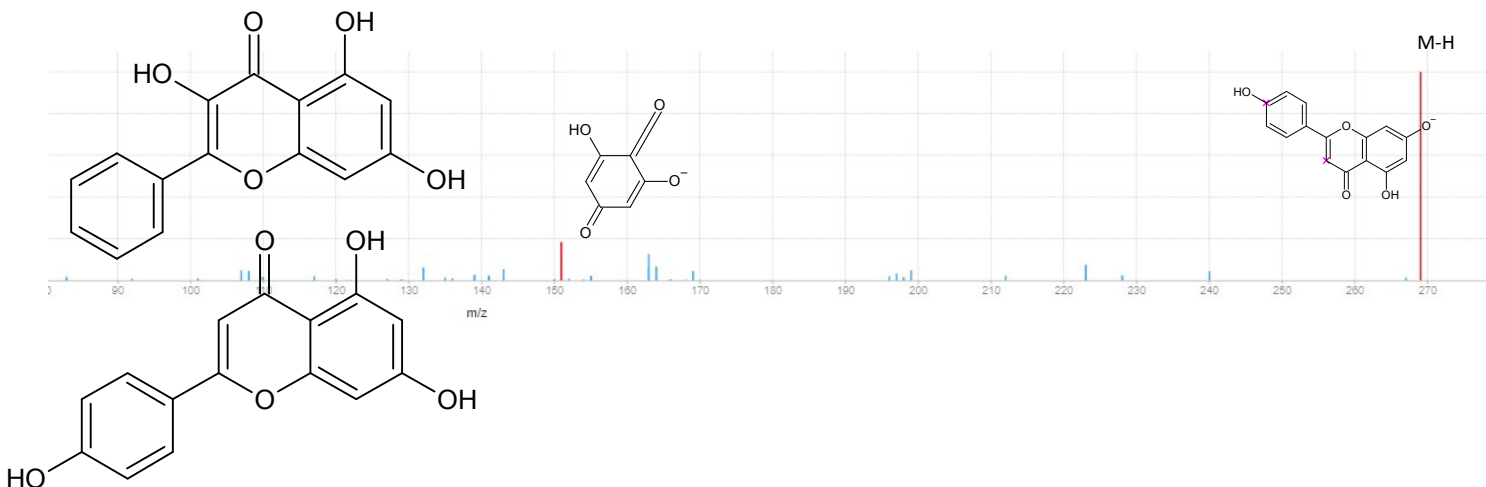

**Figure S21 5.52\_315.1573m/z ((E)-3-(2,3-dihydro-2-(1-hydroxy-1-methylethenyl)-7-prenyl-5-benzofuranyl)-2-propenoic acid)**

(Tazawa, Warashina et al. 1998)

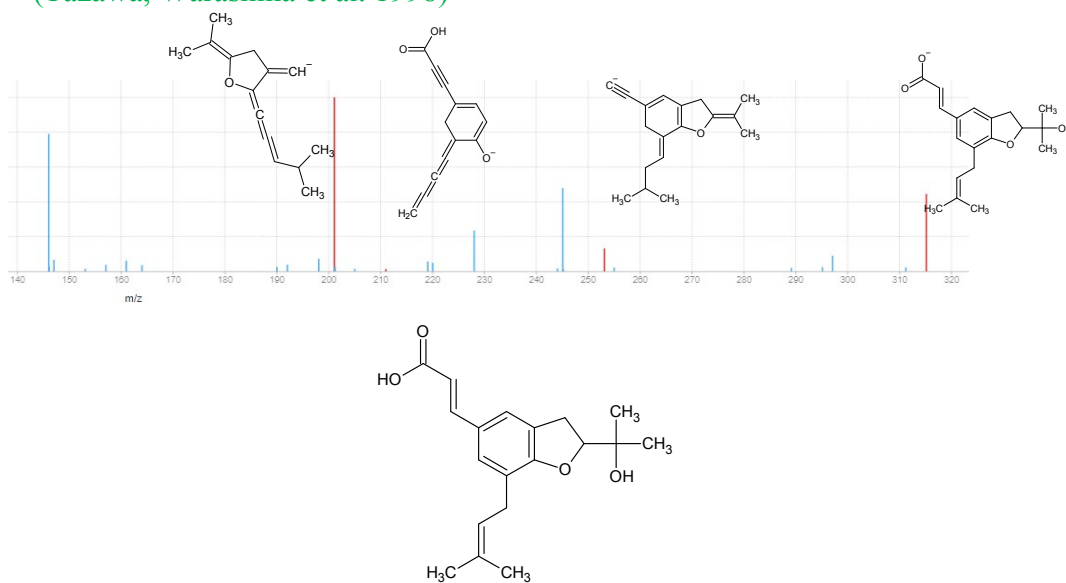



**Figure S22 5.95\_380.1945n ((E)-2,6-bis(3-methyl-2-buten-1-yl)-3,3',5,5'-tetrahydroxystilbene)**

(Duke, Tran et al. 2017)

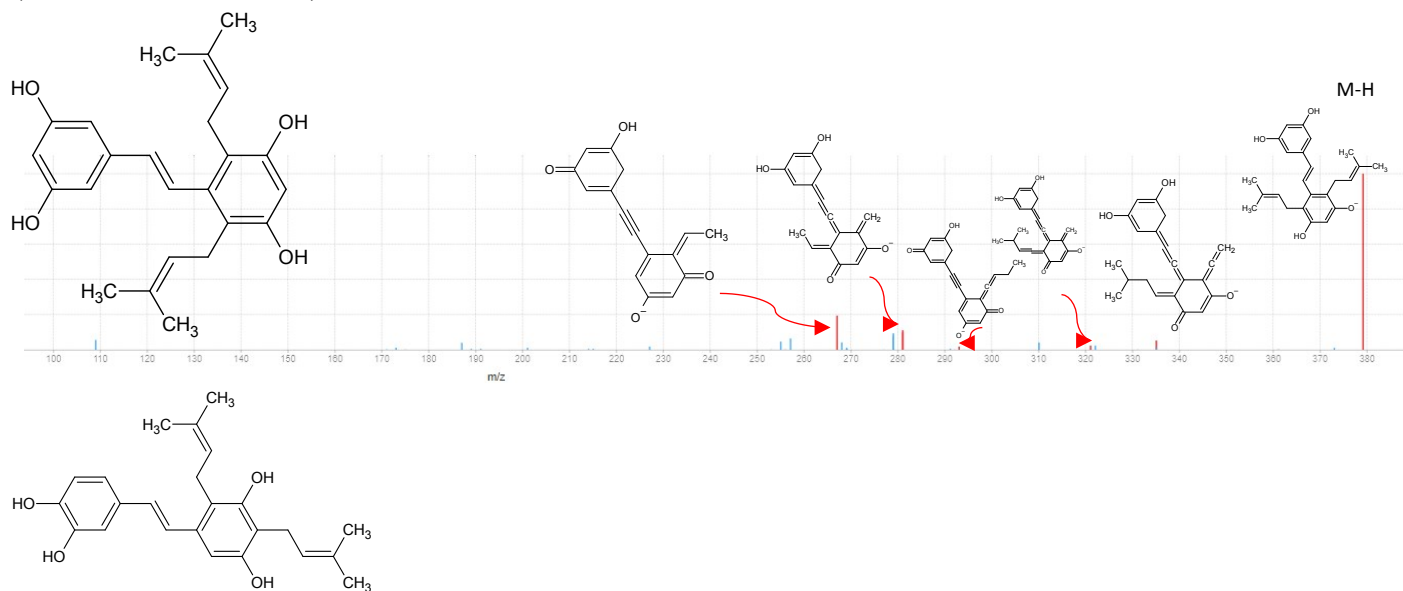

**Figure S23 5.96\_342.1442n (Prenyl-tetrahydroxy-dihydrochalcone)**

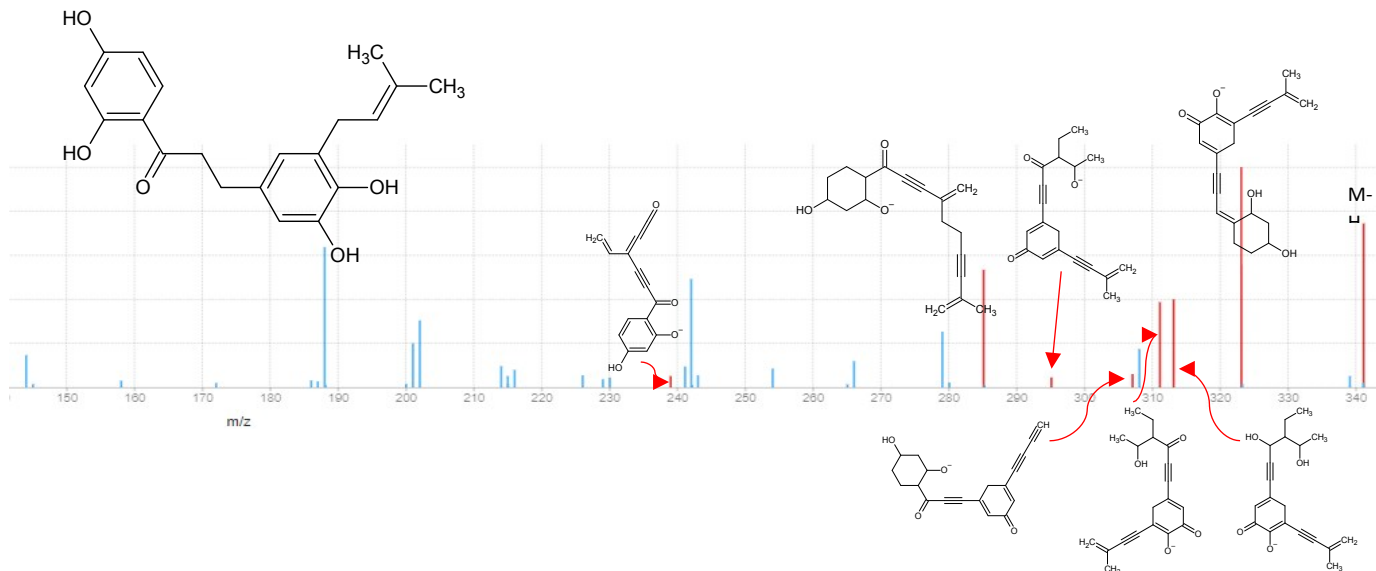

**Figure S24 6.15\_490.3635n (Barringtogenol C-like)**

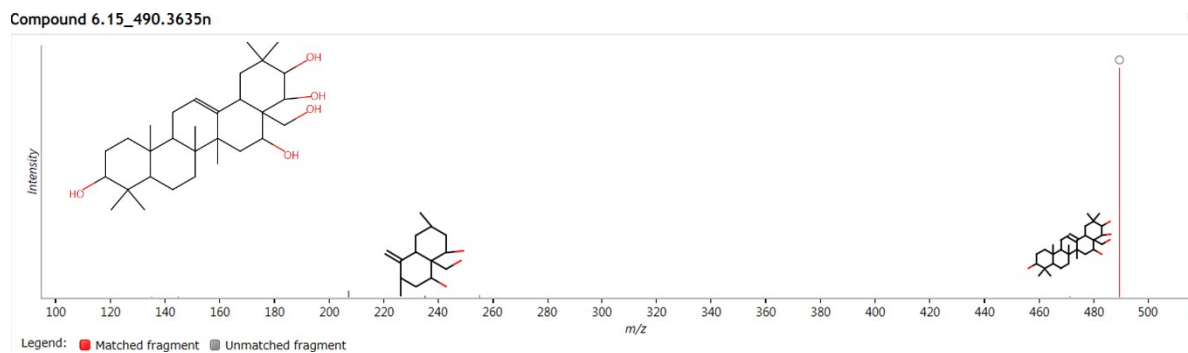

**Figure S25 6.34\_299.1630m/z (ArtepillinC)**

(Hayashi, Komura et al. 1999)

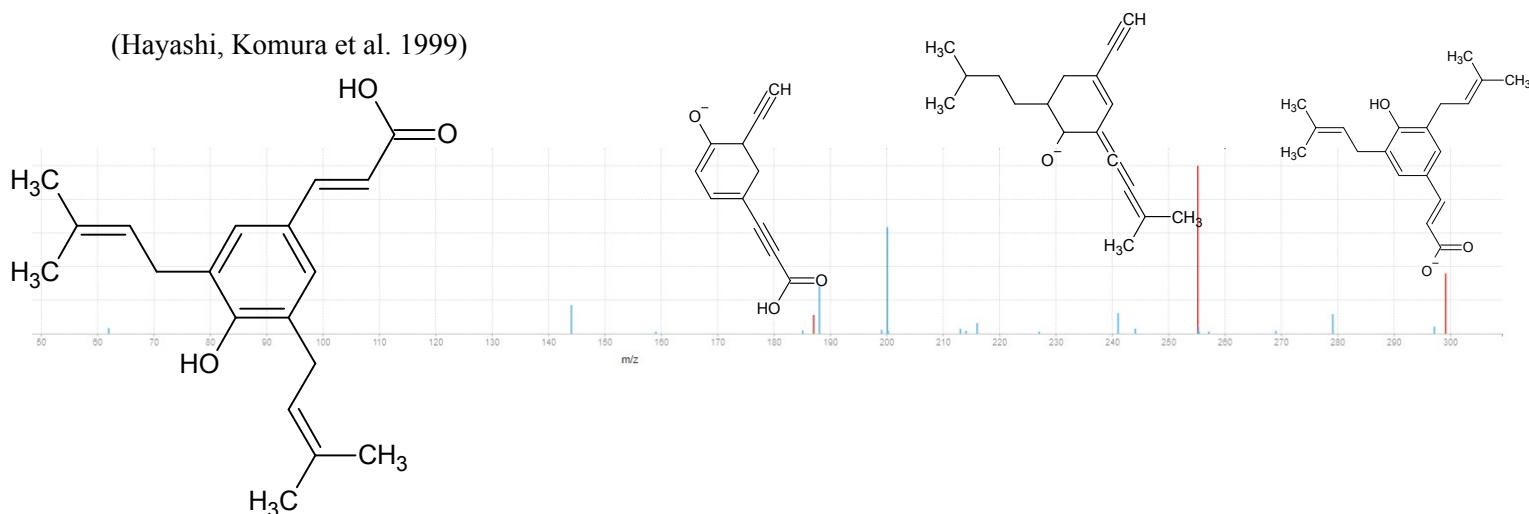

**Figure S26 6.46\_489.3562m/z (6beta-acetoxy-24-methylcholestan-3beta,5alpha,22R,24-tetrol)**

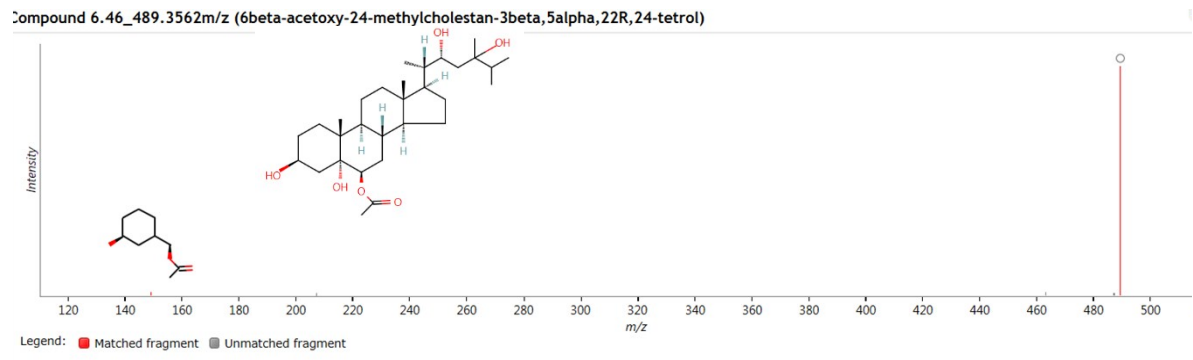

Figure S27 6.59\_344.2306n (Methyl 4,6-O-(10-undecenylidene)hexopyranoside)

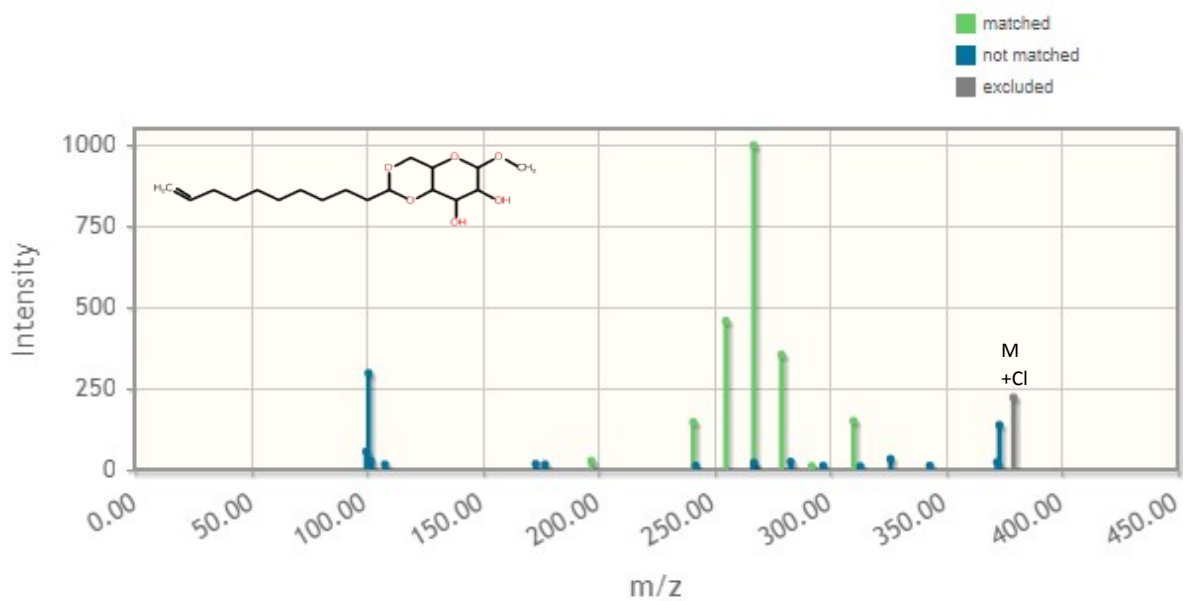

Figure S28 6.94\_424.1860n (Propolin C/D/F)

(Chen, Wu et al. 2004, Kumazawa, Goto et al. 2004, Huang, Huang et al. 2007, Raghukumar, Vali et al. 2010)

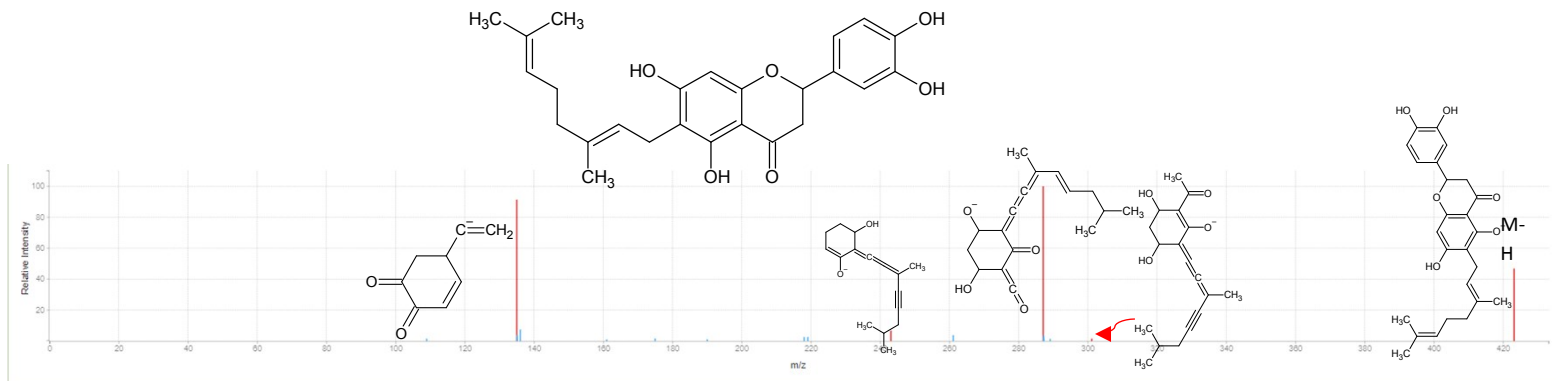



**Figure S30 6.98\_408.1906n (3',8-diprenylnaringenin)**

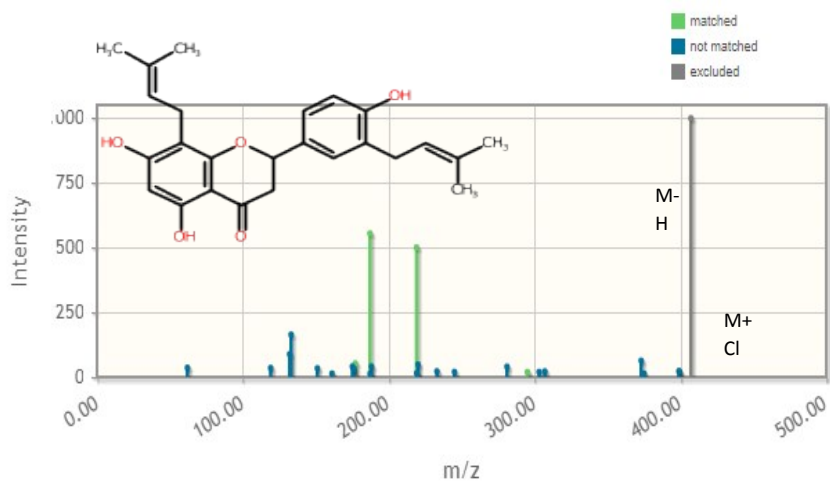

**Fragment 1**

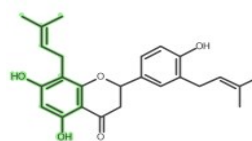

**Formula** [C11H12O2+H]-  
**Mass** 177.09216  
**Peak m/z** 177.0903

**Fragment 2**

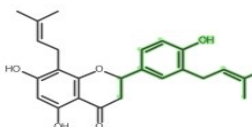

**Formula** [C13H16O]-H-  
**Mass** 187.11291  
**Peak m/z** 187.1111

**Fragment 3**

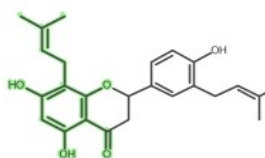

**Formula** [C12H12O4]-H-  
**Mass** 219.06632  
**Peak m/z** 219.0646

**Fragment 4**

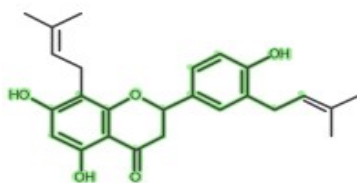

**Formula** [C17H13O5-H]-H-  
**Mass** 295.06123  
**Peak m/z** 295.0595

**Fragment 5** M-H (407.1834m/z)

**Fragment 6** M+Cl (443.1452 m/z)

Figure S31 7.12\_334.2115n (Agathic acid)

(Banskota, Tezuka et al. 1998)

Compound 7.12\_334.2115n

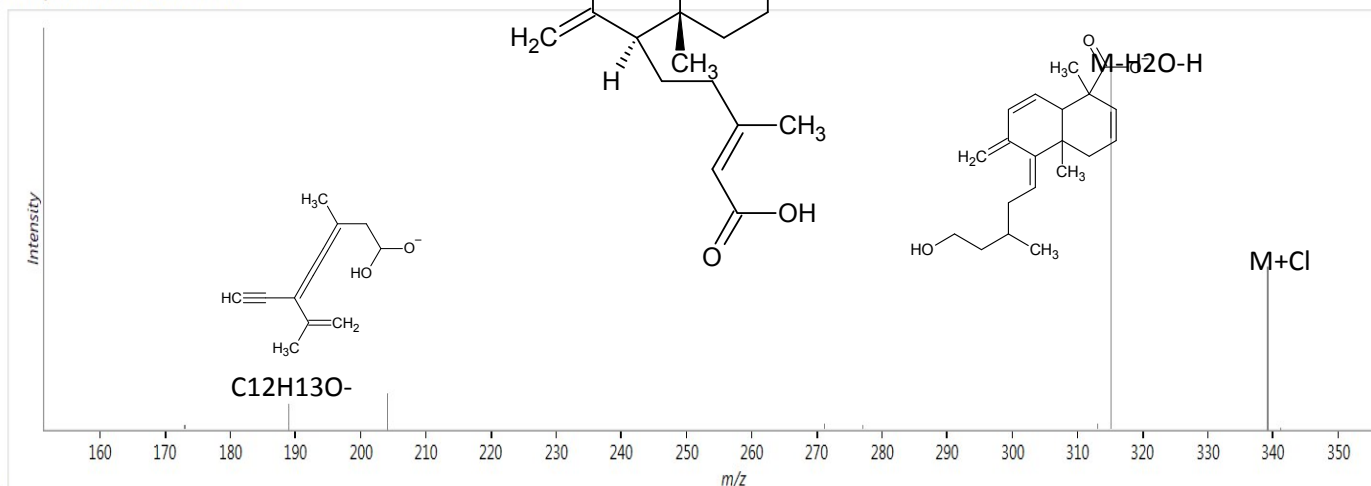

Figure S32 7.37\_337.1057m/z (pinobanksin-3-pentanoate)

(Kumazawa, Hayashi et al. 2002, Usia, Banskota et al. 2002, Alday, Valencia et al. 2015)

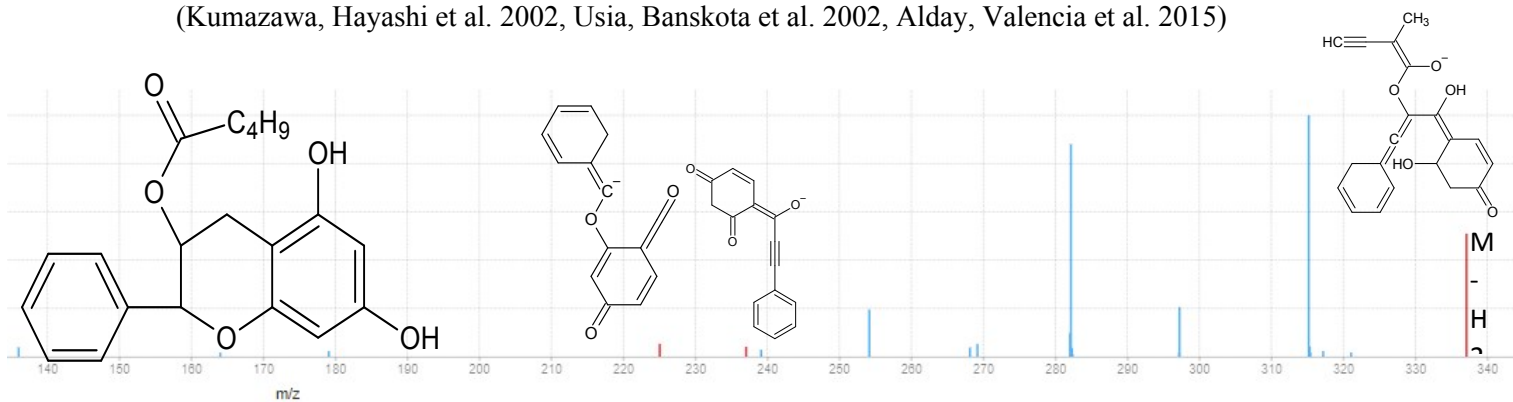

Figure S33 6.92\_355.1185m/z pinobanksin 3-pentanoate

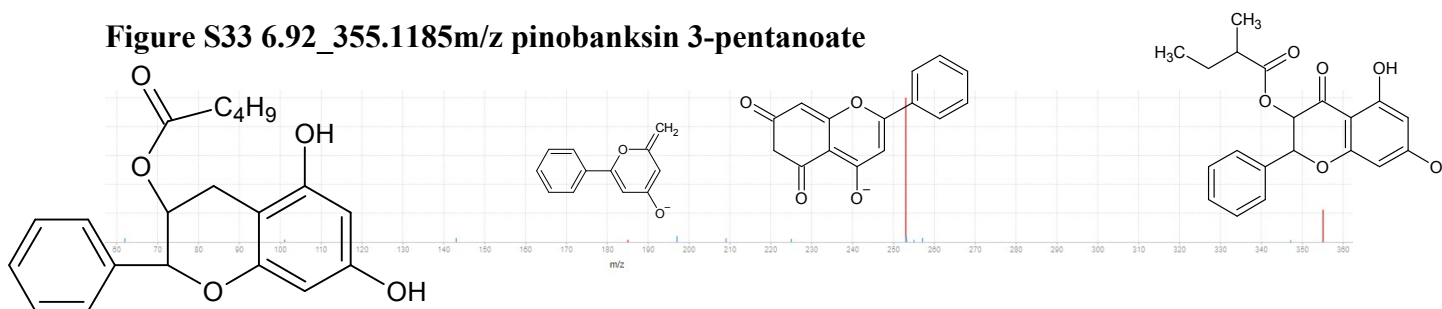

### Figure S34 7.43\_369.1107m/z (6-cinnamylchrysin)

(Usia, Banskota et al. 2002)

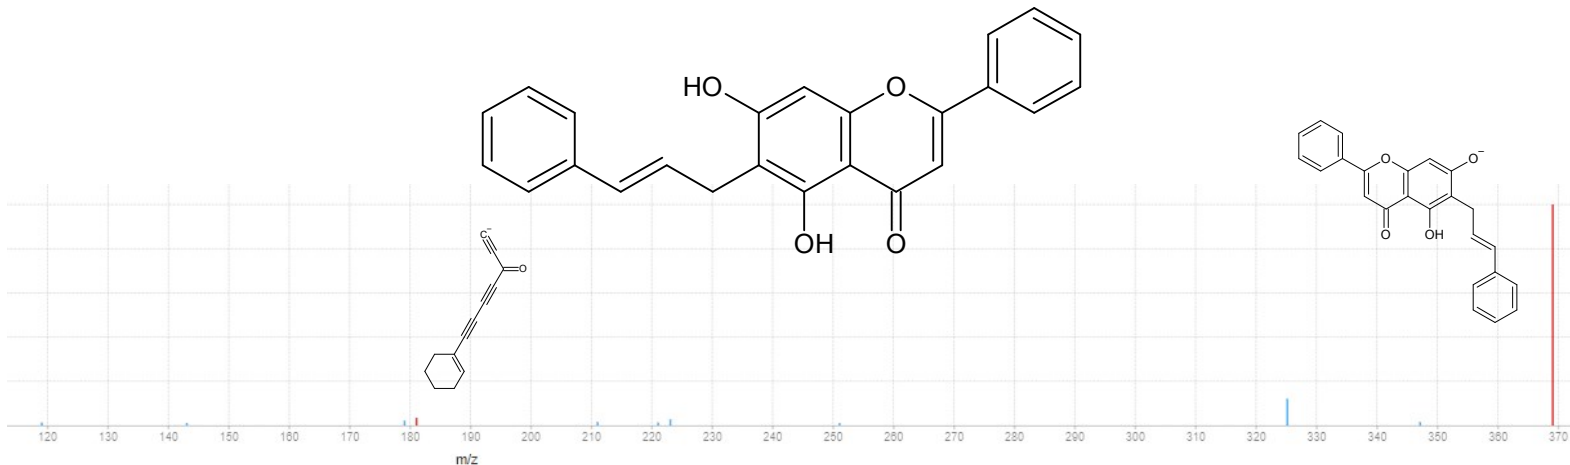

### Figure S35 7.45\_385.1056m/z (Dimethoxy-6'',6''-dimethylpyranoflavone)

Compound 7.45\_385.1056m/z (3,6-Dimethoxy-6'',6''-dimethylpyrano[2,3:7,8]flavone)

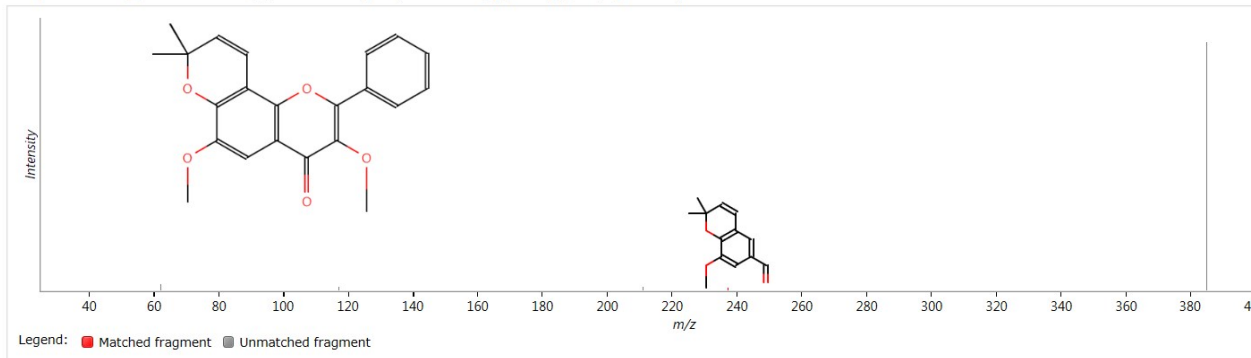

### Figure S36 7.57\_385.1061m/z (Gibberellin A29/A1/A34/A36/A58/A60)

(Kim, Kim et al. 2019, Nani, Sardi et al. 2020)

Compound 7.57\_385.1061m/z (Gibberellin A34)

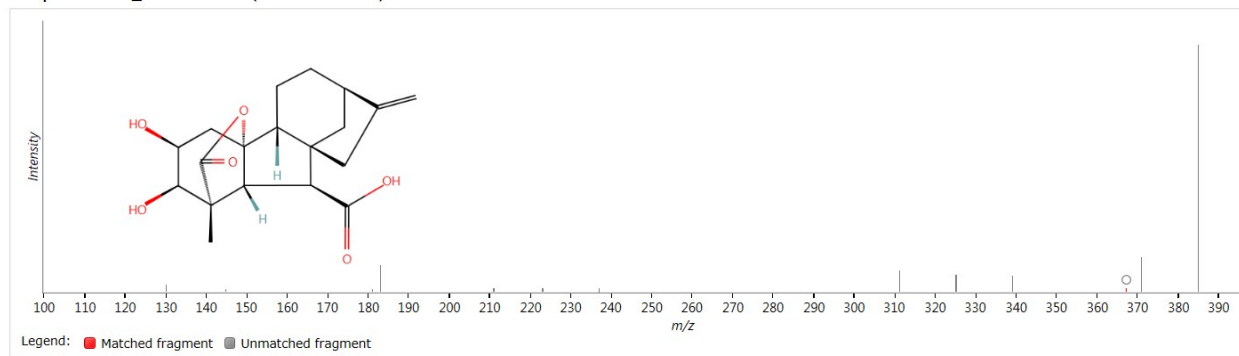



**Figure S37 7.76\_407.1835m/z (8-geranyl naringenin(bonannione A,sophoraflavanone A))**

(Inui, Hosoya et al. 2012)

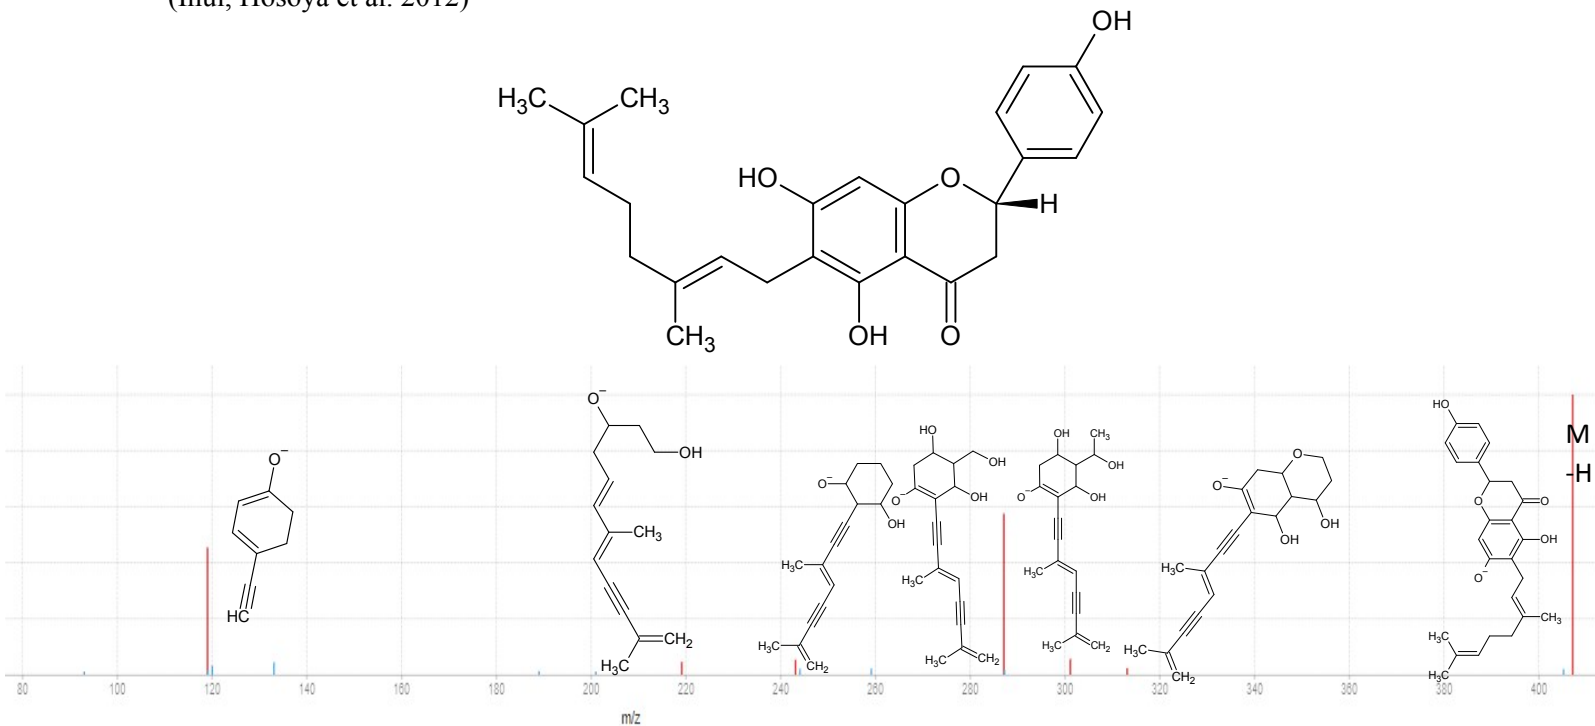

**Figure S38 8.96\_471.3450m/z (hydroxymangiferolic acid/hydroxyisomangiferolic acid (3,23-Dihydroxycycloart-24-en-26-oic acid))**

(Li, Awale et al. 2009, Nguyen, Nguyen et al. 2017)

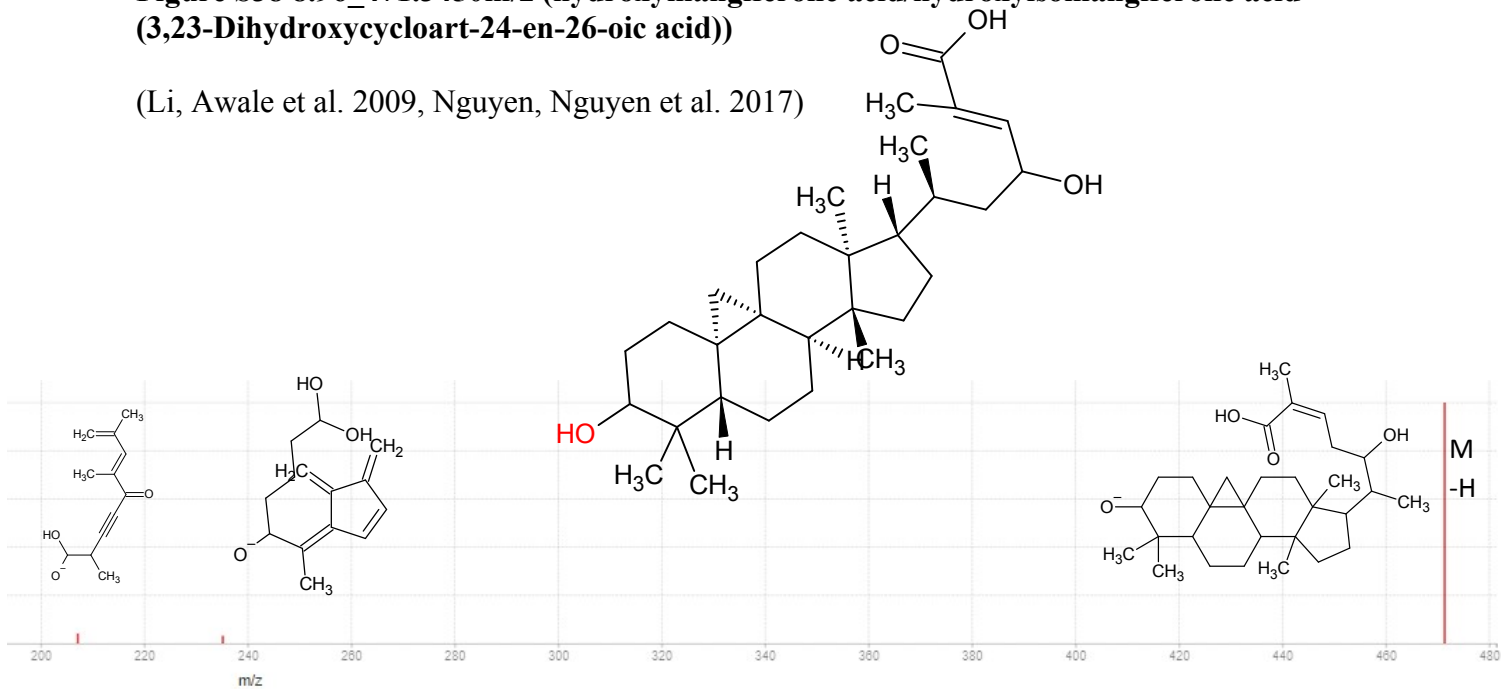

**Figure S39 8.96\_471.3458m/z (hydroxymangiferolic acid/hydroxyisomangiferolic acid (3,23-Dihydroxycycloart-24-en-26-oic acid))**

(Li, Awale et al. 2009, Nguyen, Nguyen et al. 2017)

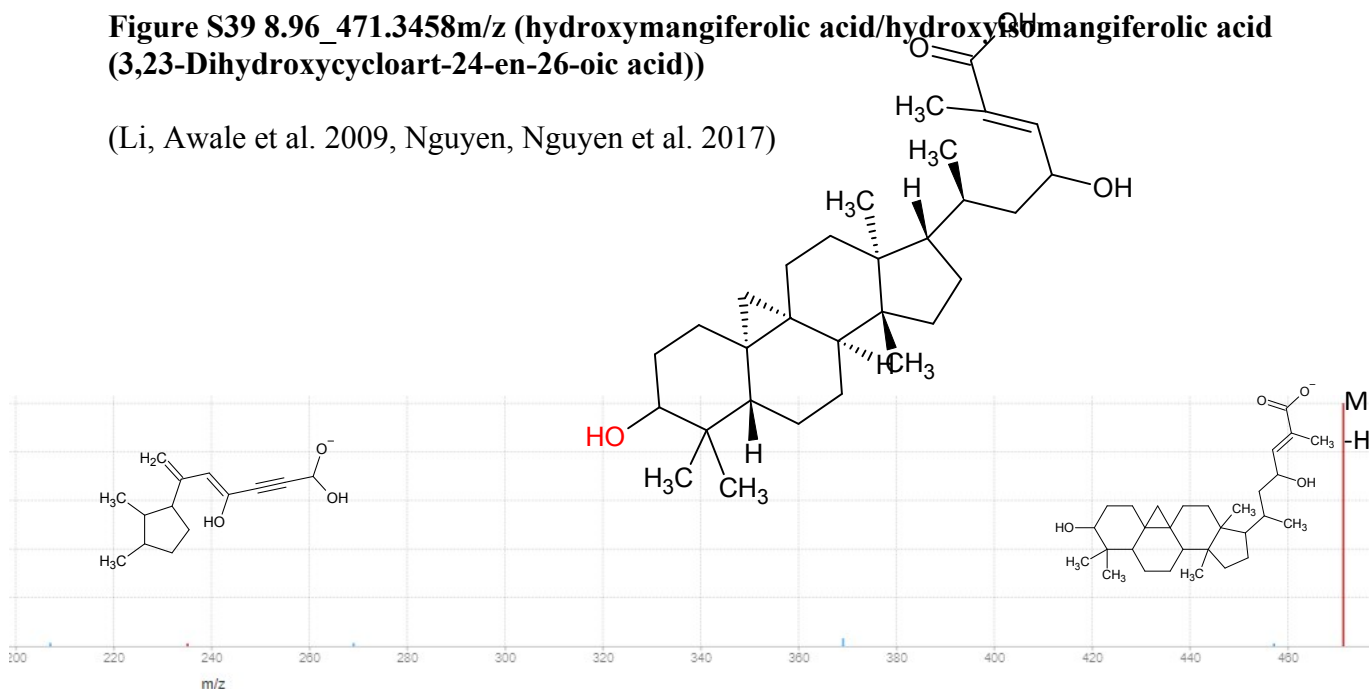

\*Matched fragments colored red

**Figure S40 9.21\_471.3448m/z (hydroxymangiferolic acid/hydroxyisomangiferolic acid (3,23-Dihydroxycycloart-24-en-26-oic acid))**

(Li, Awale et al. 2009, Nguyen, Nguyen et al. 2017)

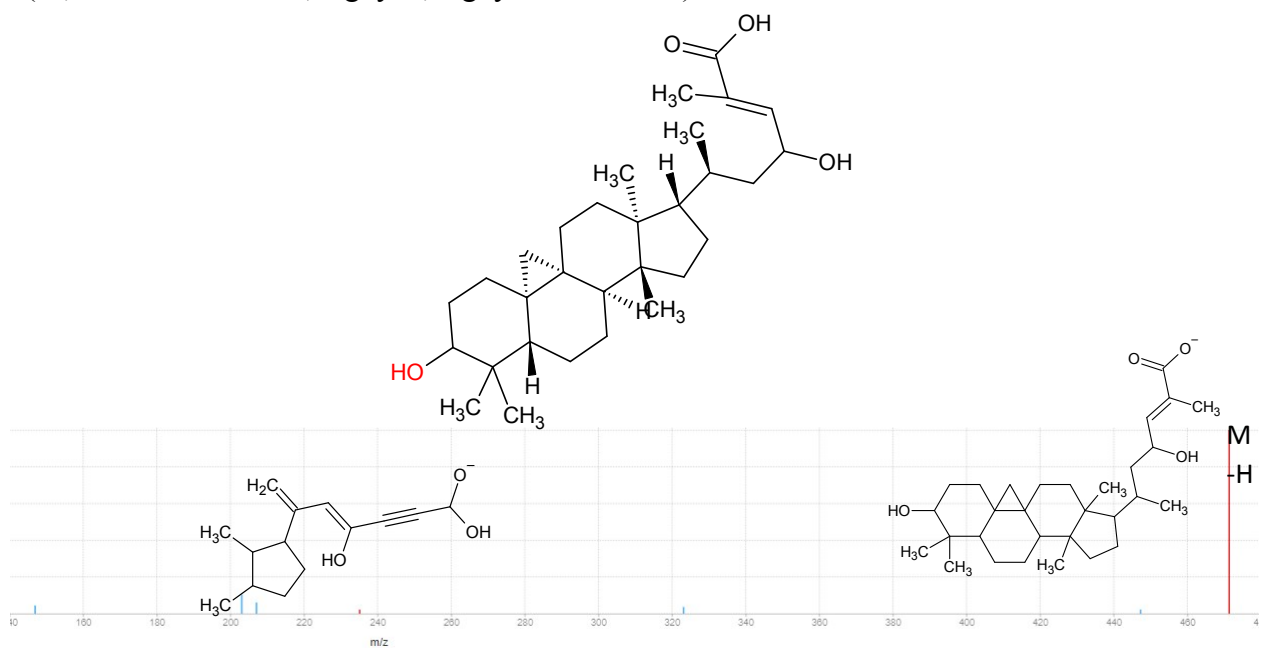

\*Matched fragments colored red

**Figure S41 9.04\_491.2414m/z (Propolin G/Solophenol A/Nymphaeol C (Geranyl-tetrahydroxy-prenylflavanone))**

(Kumazawa, Goto et al. 2004, Huang, Huang et al. 2007, Raghukumar, Vali et al. 2010, Trusheva, Popova et al. 2011, Inui, Hosoya et al. 2012)

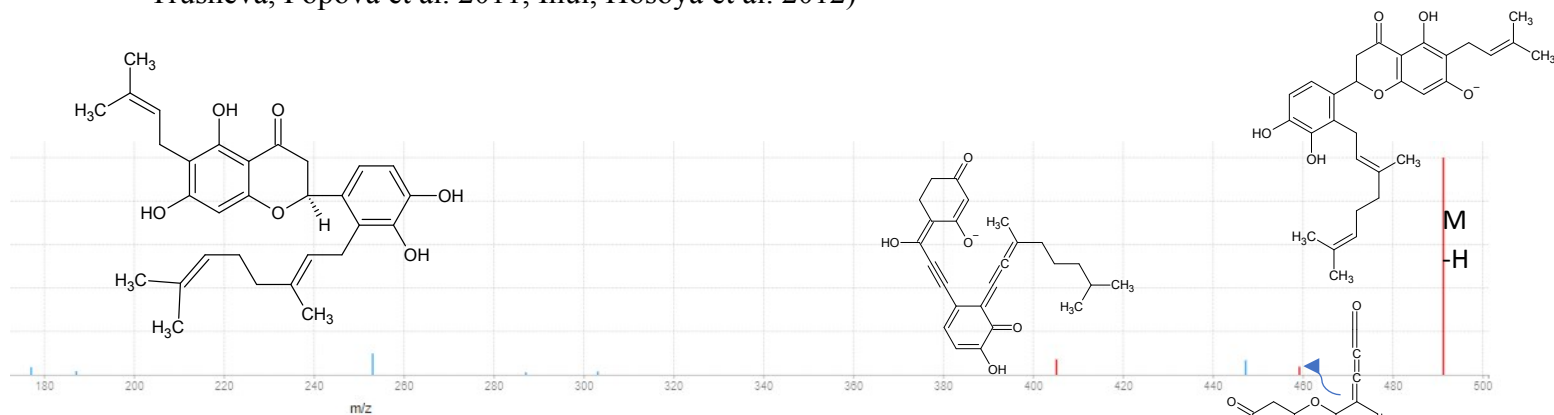

\*Matched fragments colored red

**Figure S42 9.21\_492.2487n (Propolin G/Solophenol A/Nymphaeol C (Geranyl-tetrahydroxy-prenylflavanone))**

(Kumazawa, Goto et al. 2004, Huang, Huang et al. 2007, Raghukumar, Vali et al. 2010, Trusheva, Popova et al. 2011, Inui, Hosoya et al. 2012)

All adducts

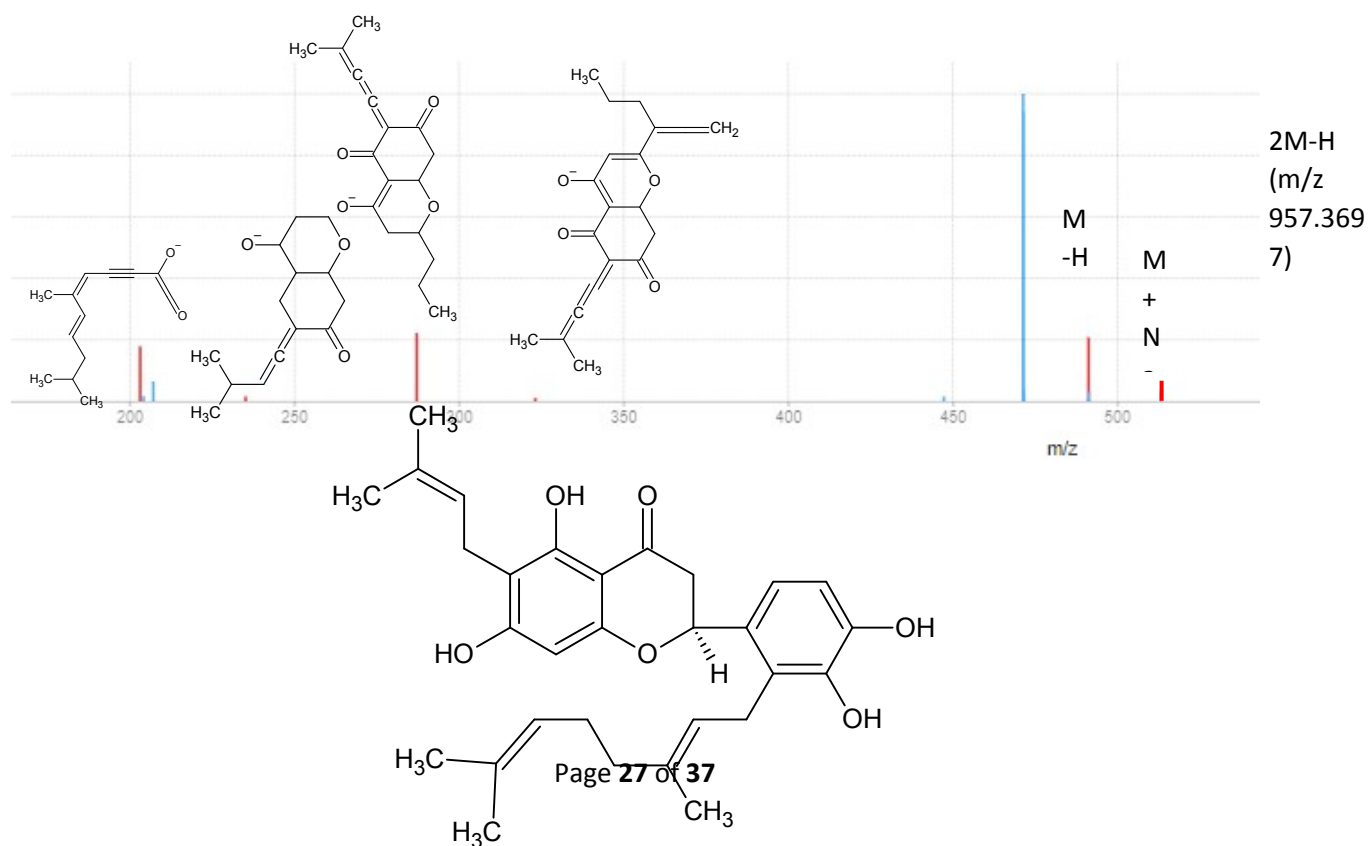

**Figure S43 9.50\_613.3172m/z (Spirostenyl-hexoside)**

Compound 9.50\_613.3172m/z (Trillin)

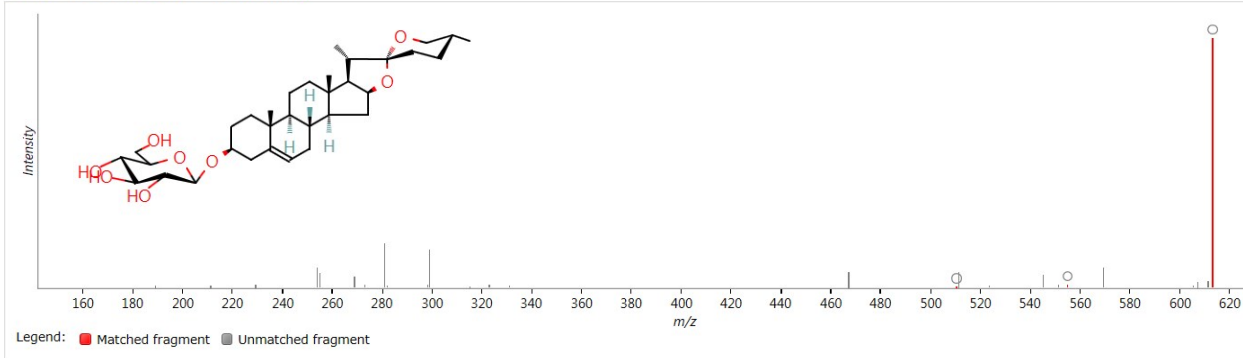

**Figure S44 9.51\_496.3161n (PG(P-18:0/0:0))**

Compound 9.51\_496.3161n (PG(P-18:0/0:0))

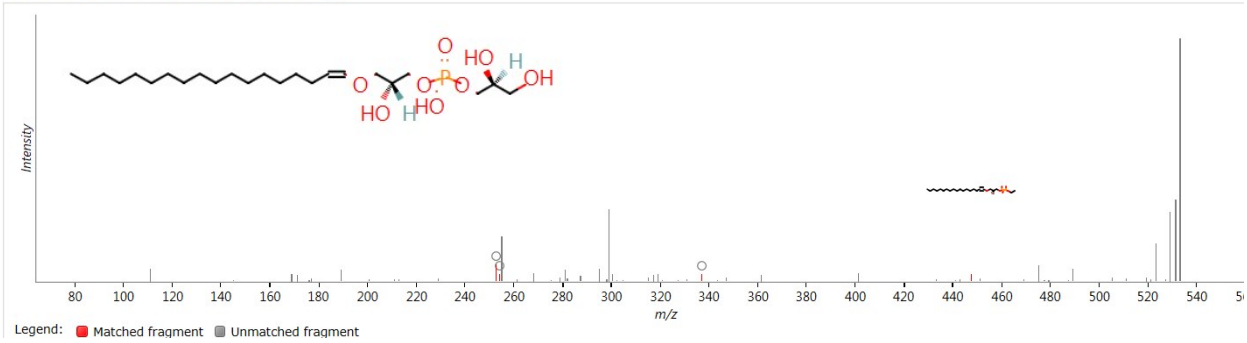

**Figure S45 9.68\_512.3120n (PG(18:0/0:0))**

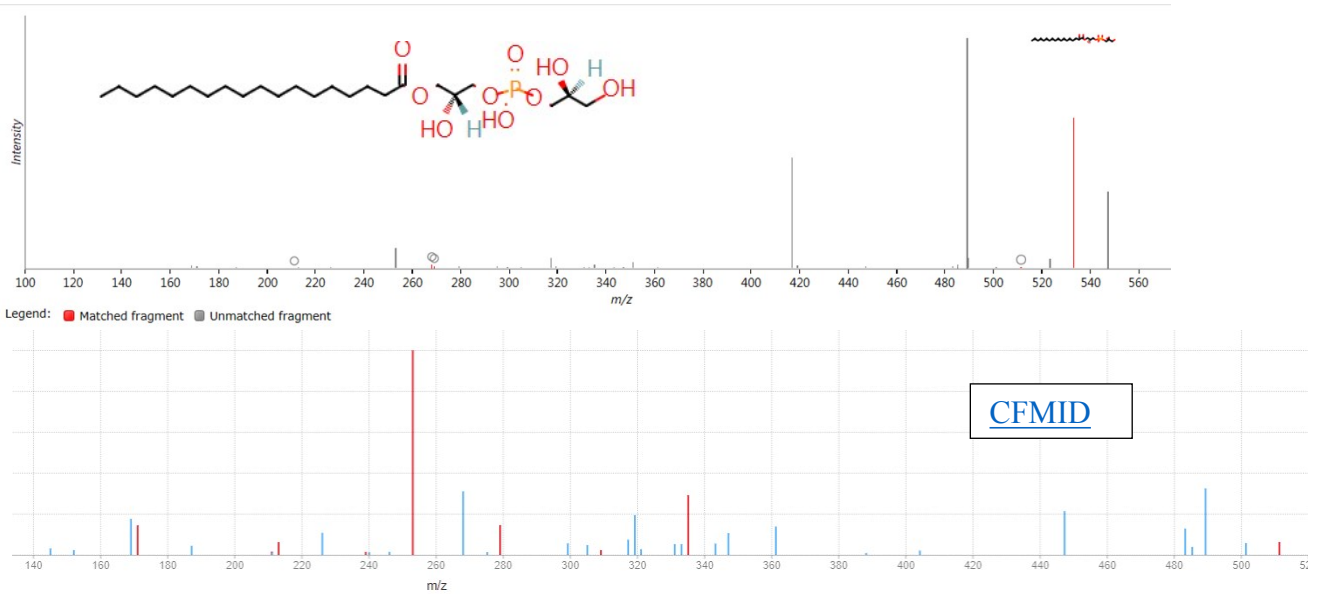

**Figure S46 9.69\_455.3493m/z (Mangiferolic acid/isomangiferolic acid/12-Hydroxy-3,4-seco-cycloarta-4(28),24-dien-3-oic acid)**

(Li, Awale et al. 2009, Popova, Chinou et al. 2009, Kardar, Zhang et al. 2014, Sanpa, Popova et al. 2017)

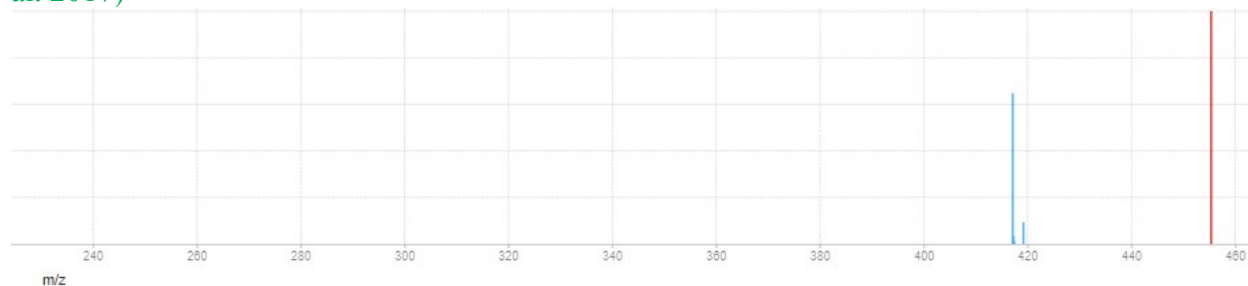

Potential candidate

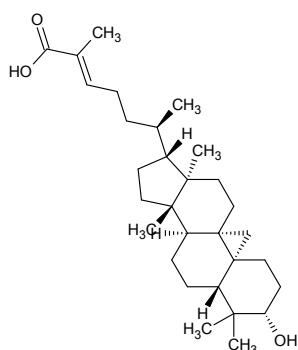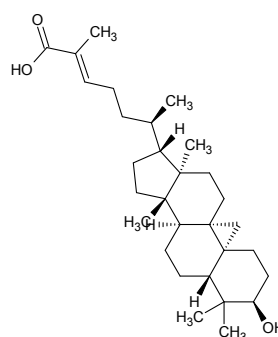

Mangiferolic

Isomangiferolic

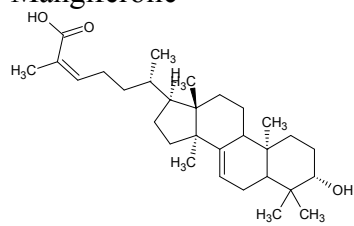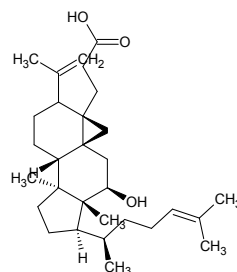

24(Z)-3-hydroxyeupha-7,24-dien-26-oic acid

3,4-seco-cycloarta-12-hydroxy-4(28),24-dien-3-oic acid



Figure S48 10.38\_514.3308n (Spirost-5-en-3,11-diyl diacetate)

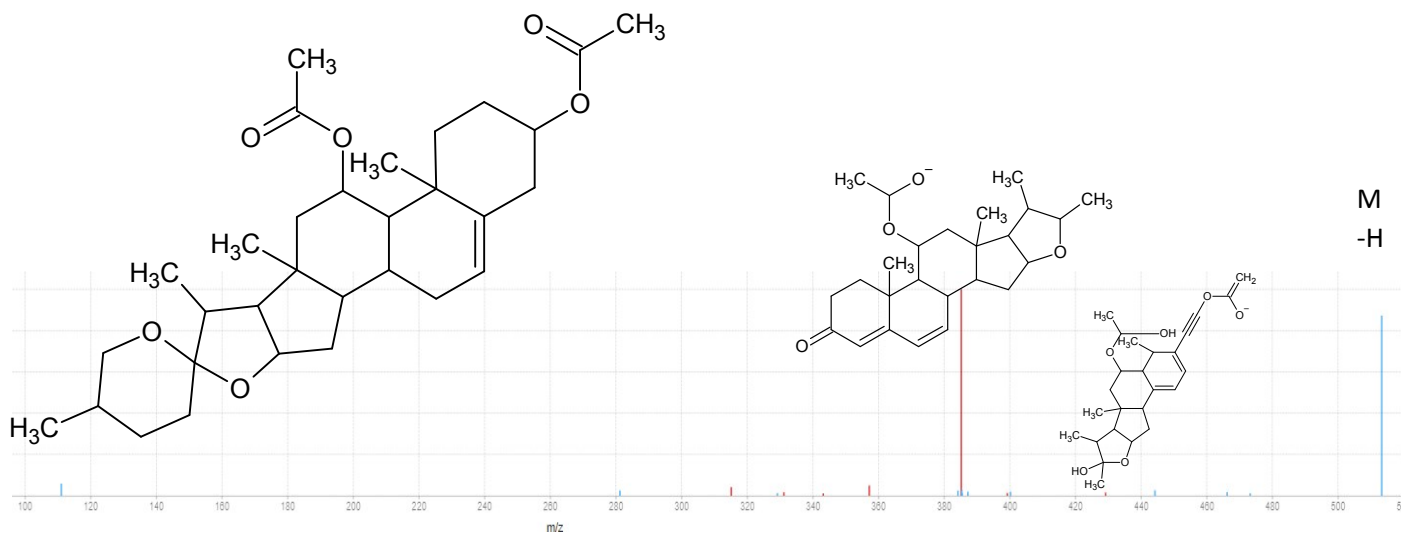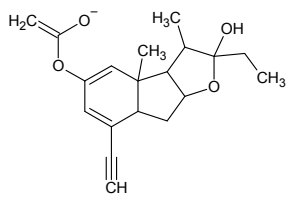

315.1584

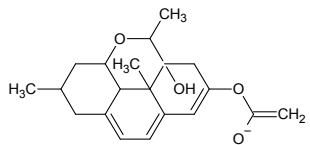

331.1899

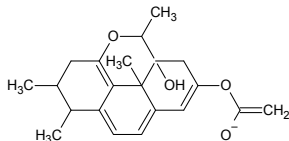

343.1895

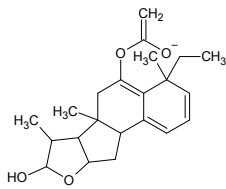

357.2053

**Figure S49 10.65\_528.3449n ((24E)-3alpha-Acetoxy-15alpha,22S-dihydroxylanosta-7,9(11),24-trien-26-oic acid)**

Compound 10.65\_528.3449n ((24E)-3alpha-Acetoxy-15alpha,22S-dihydroxylanosta-7,9(11),24-trien-26-oic acid)

He

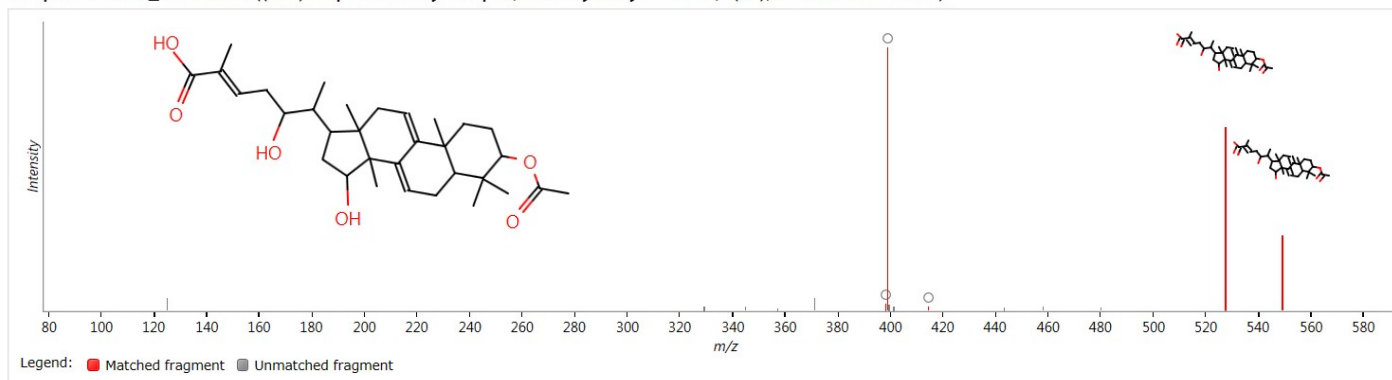



**Table S1 UPLC-DAD quantified phenolics in propolis samples (Mean  $\pm$ SD)**

|                     | <b>BP-1</b>        | <b>AP-1</b>      | <b>CP-1</b>     | <b>AP-2</b>      |
|---------------------|--------------------|------------------|-----------------|------------------|
|                     | Concentration mg/g |                  |                 |                  |
| <b>CAPE</b>         | 0.55 $\pm$ 0.01n   | 1.63 $\pm$ 0.01  | 1.59 $\pm$ 0.06 | 1.98 $\pm$ 0.14  |
| <b>Artepellin C</b> | 4.27 $\pm$ 0.002   | 0.5 $\pm$ 0.11   | 0.39 $\pm$ 0.09 | 0.59 $\pm$ 0.07  |
| <b>Galagin</b>      | 0.97 $\pm$ 0.01    | 11.38 $\pm$ 1.36 | 1.64 $\pm$ 0.14 | 6.34 $\pm$ 0.74  |
| <b>Chrysin</b>      | 2.28 $\pm$ 0.01    | 1.5 $\pm$ 0.17   | 4.56 $\pm$ 0.5  | 5.91 $\pm$ 0.79  |
| <b>Pinocebrim</b>   | 2.28 $\pm$ 0.01    | 8.37 $\pm$ 1.14  | 9.17 $\pm$ 1    | 26.24 $\pm$ 2.52 |
| <b>Daidzen</b>      | 3.07 $\pm$ 0.01    | 5.99 $\pm$ 1.31  | 6.9 $\pm$ 1.045 | 7.65 $\pm$ 1.42  |
| <b>Narigenin</b>    | 1.59 $\pm$ 0.15    | 3.92 $\pm$ 0.99  | 6.09 $\pm$ 1.43 | 1.85 $\pm$ 0.14  |

| <b>Tukey's multiple comparisons test</b> | <b>Mean Diff.</b> | <b>95% CI of diff.</b>  | <b>Significant?</b> | <b>Summary</b> |
|------------------------------------------|-------------------|-------------------------|---------------------|----------------|
| <b>CAPE</b>                              |                   |                         |                     |                |
| AP-1 vs. AP-2                            | -0.3437           | -2.164 to 1.477         | No                  | ns             |
| AP-1 vs. BP-1                            | 1.083             | -0.7379 to 2.904        | No                  | ns             |
| AP-1 vs. CP-1                            | 0.04340           | -1.777 to 1.864         | No                  | ns             |
| AP-2 vs. BP-1                            | 1.427             | -0.3942 to 3.247        | No                  | ns             |
| AP-2 vs. CP-1                            | 0.3871            | -1.434 to 2.208         | No                  | ns             |
| BP-1 vs. CP-1                            | -1.039            | -2.860 to 0.7813        | No                  | ns             |
| <b>Artepellin C</b>                      |                   |                         |                     |                |
| AP-1 vs. AP-2                            | -0.08799          | -1.909 to 1.733         | No                  | ns             |
| <b>AP-1 vs. BP-1</b>                     | <b>-3.771</b>     | <b>-5.592 to -1.951</b> | <b>Yes</b>          | <b>****</b>    |
| AP-1 vs. CP-1                            | 0.1055            | -1.715 to 1.926         | No                  | ns             |
| <b>AP-2 vs. BP-1</b>                     | <b>-3.683</b>     | <b>-5.504 to -1.863</b> | <b>Yes</b>          | <b>****</b>    |
| AP-2 vs. CP-1                            | 0.1935            | -1.627 to 2.014         | No                  | ns             |
| BP-1 vs. CP-1                            | 3.877             | 2.056 to 5.698          | Yes                 | ****           |
| <b>Galagin</b>                           |                   |                         |                     |                |
| AP-1 vs. AP-2                            | 5.036             | 3.216 to 6.857          | Yes                 | ****           |
| AP-1 vs. BP-1                            | 10.41             | 8.585 to 12.23          | Yes                 | ****           |
| AP-1 vs. CP-1                            | 9.739             | 7.918 to 11.56          | Yes                 | ****           |
| AP-2 vs. BP-1                            | 5.369             | 3.548 to 7.190          | Yes                 | ****           |
| AP-2 vs. CP-1                            | 4.703             | 2.882 to 6.523          | Yes                 | ****           |
| BP-1 vs. CP-1                            | -0.6664           | -2.487 to 1.154         | No                  | ns             |
| <b>Chrysin</b>                           |                   |                         |                     |                |
| AP-1 vs. AP-2                            | -4.413            | -6.234 to -2.593        | Yes                 | ****           |
| AP-1 vs. BP-1                            | -0.7841           | -2.605 to 1.037         | No                  | ns             |
| AP-1 vs. CP-1                            | -3.060            | -4.881 to -1.240        | Yes                 | ***            |
| AP-2 vs. BP-1                            | 3.629             | 1.809 to 5.450          | Yes                 | ****           |
| AP-2 vs. CP-1                            | 1.353             | -0.4678 to 3.174        | No                  | ns             |
| BP-1 vs. CP-1                            | -2.276            | -4.097 to -0.4556       | Yes                 | **             |
| <b>Pinocebrim</b>                        |                   |                         |                     |                |
| AP-1 vs. AP-2                            | -17.87            | -19.69 to -16.05        | Yes                 | ****           |
| AP-1 vs. BP-1                            | 6.089             | 4.268 to 7.909          | Yes                 | ****           |
| AP-1 vs. CP-1                            | -0.8055           | -2.626 to 1.015         | No                  | ns             |
| AP-2 vs. BP-1                            | 23.96             | 22.14 to 25.78          | Yes                 | ****           |
| AP-2 vs. CP-1                            | 17.07             | 15.25 to 18.89          | Yes                 | ****           |
| BP-1 vs. CP-1                            | -6.894            | -8.715 to -5.073        | Yes                 | ****           |
| <b>Daidzen</b>                           |                   |                         |                     |                |

|                  |         |                   |     |      |
|------------------|---------|-------------------|-----|------|
| AP-1 vs. AP-2    | -1.666  | -3.487 to 0.1543  | No  | ns   |
| AP-1 vs. BP-1    | 2.917   | 1.096 to 4.737    | Yes | ***  |
| AP-1 vs. CP-1    | -0.9148 | -2.736 to 0.9059  | No  | ns   |
| AP-2 vs. BP-1    | 4.583   | 2.762 to 6.404    | Yes | **** |
| AP-2 vs. CP-1    | 0.7516  | -1.069 to 2.572   | No  | ns   |
| BP-1 vs. CP-1    | -3.831  | -5.652 to -2.011  | Yes | **** |
| <b>Narigenin</b> |         |                   |     |      |
| AP-1 vs. AP-2    | 2.076   | 0.2552 to 3.897   | Yes | *    |
| AP-1 vs. BP-1    | 2.331   | 0.5103 to 4.152   | Yes | **   |
| AP-1 vs. CP-1    | -2.169  | -3.989 to -0.3479 | Yes | *    |
| AP-2 vs. BP-1    | 0.2551  | -1.566 to 2.076   | No  | ns   |
| AP-2 vs. CP-1    | -4.245  | -6.065 to -2.424  | Yes | **** |
| BP-1 vs. CP-1    | -4.500  | -6.321 to -2.679  | Yes | **** |

| Source of Variation | % of total variation | P value  | P value summary | Significant?       |            | Two-way ANOVA, Alpha <sup>a</sup> |
|---------------------|----------------------|----------|-----------------|--------------------|------------|-----------------------------------|
| Interaction         | 46.79                | < 0.0001 | ****            | Yes                |            |                                   |
| Row Factor          | 39.11                | < 0.0001 | ****            | Yes                |            |                                   |
| Column Factor       | 12.30                | < 0.0001 | ****            | Yes                |            |                                   |
| ANOVA table         | SS                   | DF       | MS              | F (DFn, DFd)       | P value    |                                   |
| Interaction         | 1038                 | 18       | 57.68           | F (18, 56) = 81.33 | P < 0.0001 |                                   |
| Row Factor          | 867.9                | 6        | 144.6           | F (6, 56) = 203.9  | P < 0.0001 | 0.05                              |
| Column Factor       | 272.9                | 3        | 90.98           | F (3, 56) = 128.3  | P < 0.0001 |                                   |
| Residual            | 39.72                | 56       | 0.7093          |                    |            |                                   |

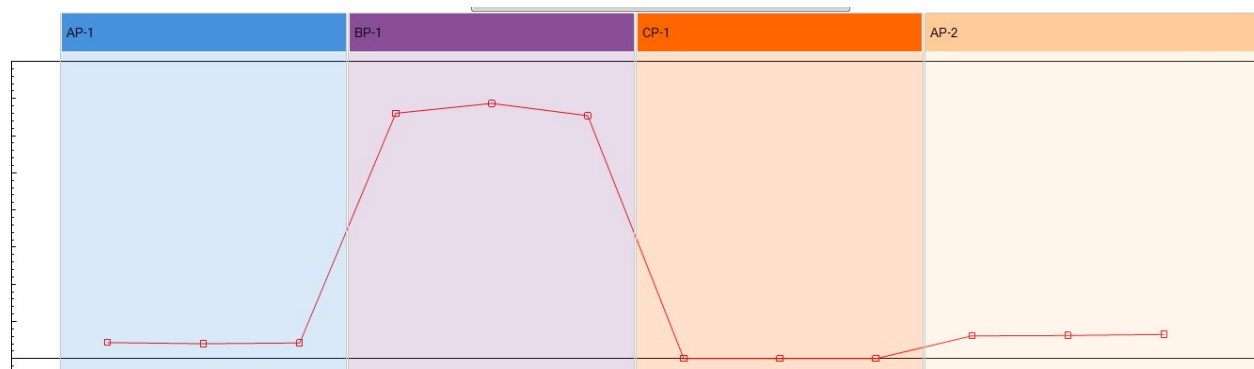

**Figure S50.** The abundance of Artepillin C among propolis samples (UPLC-qTOF-MS)

## References

- Abu-Mellal, A., N. Koolaji, R. K. Duke, V. H. Tran and C. C. Duke (2012). "Prenylated cinnamate and stilbenes from Kangaroo Island propolis and their antioxidant activity." *Phytochemistry* **77**: 251-259.
- Aguero, M. B., M. Gonzalez, B. Lima, L. Svetaz, M. Sanchez, S. Zacchino, G. E. Feresin, G. Schmeda-Hirschmann, J. Palermo, D. Wunderlin and A. Tapia (2010). "Argentinean propolis from *Zuccagnia punctata* Cav. (Caesalpinieae) exudates: phytochemical characterization and antifungal activity." *J Agric Food Chem* **58**(1): 194-201.
- Aguero, M. B., L. Svetaz, M. Sanchez, L. Luna, B. Lima, M. L. Lopez, S. Zacchino, J. Palermo, D. Wunderlin, G. E. Feresin and A. Tapia (2011). "Argentinean Andean propolis associated with the medicinal plant *Larrea nitida* Cav. (Zygophyllaceae). HPLC-MS and GC-MS characterization and antifungal activity." *Food Chem Toxicol* **49**(9): 1970-1978.
- Alday, E., D. Valencia, A. L. Carreño, P. Picerno, A. L. Piccinelli, L. Rastrelli, R. Robles-Zepeda, J. Hernandez and C. Velazquez (2015). "Apoptotic induction by pinobanksin and some of its ester derivatives from Sonoran propolis in a B-cell lymphoma cell line." *Chemico-Biological Interactions* **242**: 35-44.
- Bankova, V., N. Nikolova and M. Marcucci (1996). "A new lignan from Brazilian propolis." *Zeitschrift für Naturforschung C* **51**(9-10): 735-737.
- Bankova, V. S., S. S. Popov and N. L. Marekov (1983). "A Study on Flavonoids of Propolis." *Journal of Natural Products* **46**(4): 471-474.
- Banskota, A. H., Y. Tezuka, J. K. Prasain, K. Matsushige, I. Saiki and S. Kadota (1998). "Chemical Constituents of Brazilian Propolis and Their Cytotoxic Activities." *Journal of Natural Products* **61**(7): 896-900.
- Chen, C.-N., C.-L. Wu and J.-K. Lin (2004). "Propolin C from propolis induces apoptosis through activating caspases, Bid and cytochrome c release in human melanoma cells." *Biochemical Pharmacology* **67**(1): 53-66.
- Duke, C. C., V. H. Tran, R. K. Duke, A. Abu-Mellal, G. T. Plunkett, D. I. King, K. Hamid, K. L. Wilson, R. L. Barrett and J. J. Bruhl (2017). "A sedge plant as the source of Kangaroo Island propolis rich in prenylated p-coumarate ester and stilbenes." *Phytochemistry* **134**: 87-97.
- Hayashi, K., S. Komura, N. Isaji, N. Ohishi and K. Yagi (1999). "Isolation of antioxidative compounds from Brazilian propolis: 3, 4-dihydroxy-5-prenylcinnamic acid, a novel potent antioxidant." *Chemical and Pharmaceutical Bulletin* **47**(11): 1521-1524.

Huang, W.-J., C.-H. Huang, C.-L. Wu, J.-K. Lin, Y.-W. Chen, C.-L. Lin, S.-E. Chuang, C.-Y. Huang and C.-N. Chen (2007). "Propolin G, a prenylflavanone, isolated from Taiwanese propolis, induces caspase-dependent apoptosis in brain cancer cells." Journal of agricultural and food chemistry **55**(18): 7366-7376.

Inui, S., T. Hosoya, Y. Shimamura, S. Masuda, T. Ogawa, H. Kobayashi, K. Shirafuji, R. T. Moli, I. Kozono, K. Shin-ya and S. Kumazawa (2012). "Solophenols B–D and Solomonin: New Prenylated Polyphenols Isolated from Propolis Collected from The Solomon Islands and Their Antibacterial Activity." Journal of Agricultural and Food Chemistry **60**(47): 11765-11770.

Kardar, M. N., T. Zhang, G. D. Coxon, D. G. Watson, J. Fearnley and V. Seidel (2014). "Characterisation of triterpenes and new phenolic lipids in Cameroonian propolis." Phytochemistry **106**: 156-163.

Kim, C. H., M. Y. Kim, S.-W. Lee and K.-S. Jang (2019). "UPLC/FT-ICR MS-based high-resolution platform for determining the geographical origins of raw propolis samples." Journal of Analytical Science and Technology **10**(1): 8.

Kumazawa, S., H. Goto, T. Hamasaka, S. Fukumoto, T. Fujimoto and T. Nakayama (2004). "A new prenylated flavonoid from propolis collected in Okinawa, Japan." Bioscience, biotechnology, and biochemistry **68**(1): 260-262.

Kumazawa, S., K. Hayashi, K. Kajiya, T. Ishii, T. Hamasaka and T. Nakayama (2002). "Studies of the constituents of Uruguayan propolis." J Agric Food Chem **50**(17): 4777-4782.

Li, F., S. Awale, Y. Tezuka and S. Kadota (2008). "Cytotoxic constituents from Brazilian red propolis and their structure–activity relationship." Bioorganic & Medicinal Chemistry **16**(10): 5434-5440.

Li, F., S. Awale, Y. Tezuka and S. Kadota (2010). "Cytotoxicity of Constituents from Mexican Propolis against a Panel of Six Different Cancer Cell Lines." Natural Product Communications **5**(10): 1934578X1000501018.

Li, F., S. Awale, H. Zhang, Y. Tezuka, H. Esumi and S. Kadota (2009). "Chemical Constituents of Propolis from Myanmar and Their Preferential Cytotoxicity against a Human Pancreatic Cancer Cell Line." Journal of Natural Products **72**(7): 1283-1287.

Matsui, T., S. Ebuchi, T. Fujise, K. J. Abesundara, S. Doi, H. Yamada and K. Matsumoto (2004). "Strong antihyperglycemic effects of water-soluble fraction of Brazilian propolis and its bioactive constituent, 3, 4, 5-tri-O-caffeoylquinic acid." Biological and Pharmaceutical Bulletin **27**(11): 1797-1803.

Mishima, S., Y. Inoh, Y. Narita, S. Ohta, T. Sakamoto, Y. Araki, K.-M. Suzuki, Y. Akao and Y. Nozawa (2005). "Identification of caffeoylquinic acid derivatives from Brazilian propolis as constituents involved in induction of granulocytic differentiation of HL-60 cells." Bioorganic & medicinal chemistry **13**(20): 5814-5818.

Nakajima, Y., M. Shimazawa, S. Mishima and H. Hara (2007). "Water extract of propolis and its main constituents, caffeoylquinic acid derivatives, exert neuroprotective effects via antioxidant actions." Life sciences **80**(4): 370-377.

Nani, B. D., J. d. C. O. Sardi, J. G. Lazarini, D. R. Silva, A. P. Massariolli, T. M. Cunha, S. M. de Alencar, M. Franchin and P. L. Rosalen (2020). "Anti-inflammatory and anti-Candida Effects of Brazilian Organic Propolis, a Promising Source of Bioactive Molecules and Functional Food." Journal of Agricultural and Food Chemistry **68**(10): 2861-2871.

Nguyen, H. X., M. T. T. Nguyen, N. T. Nguyen and S. Awale (2017). "Chemical Constituents of Propolis from Vietnamese Trigona minor and Their Antiausterity Activity against the PANC-1 Human Pancreatic Cancer Cell Line." Journal of Natural Products **80**(8): 2345-2352.

Popova, M., R. Dimitrova, H. T. Al-Lawati, I. Tsvetkova, H. Najdenski and V. Bankova (2013). "Omani propolis: chemical profiling, antibacterial activity and new propolis plant sources." Chemistry Central Journal **7**(1): 158.

Popova, M. P., I. B. Chinou, I. N. Marekov and V. S. Bankova (2009). "Terpenes with antimicrobial activity from Cretan propolis." Phytochemistry **70**(10): 1262-1271.

Raghukumar, R., L. Vali, D. Watson, J. Fearnley and V. Seidel (2010). "Antimethicillin-resistant Staphylococcus aureus (MRSA) activity of 'pacific propolis' and isolated prenylflavanones." Phytother Res **24**(8): 1181-1187.

Sanpa, S., M. Popova, T. Tunkasiri, S. Eitssayeam, V. Bankova and P. Chantawannakul (2017). "Chemical profiles and antimicrobial activities of Thai propolis collected from *Apis mellifera*." Chiang Mai J Sci **44**: 438-448.

Shaheen, S. A., M. H. A. Zarga, I. K. Nazer, R. M. Darwish and H. I. Al-Jaber (2011). "Chemical constituents of Jordanian propolis." Natural Product Research **25**(14): 1312-1318.

TATEFUJI, T., N. IZUMI, T. OHTA, S. ARAI, M. IKEDA and M. KURIMOTO (1996). "Isolation and identification of compounds from Brazilian propolis which enhance macrophage spreading and mobility." Biological and Pharmaceutical Bulletin **19**(7): 966-970.

Tazawa, S., T. Warashina, T. Noro and T. Miyase (1998). "Studies on the constituents of Brazilian propolis." Chemical and Pharmaceutical Bulletin **46**(9): 1477-1479.

Trusheva, B., M. Popova, E. B. Koendhori, I. Tsvetkova, C. Naydenski and V. Bankova (2011). "Indonesian propolis: chemical composition, biological activity and botanical origin." Natural Product Research **25**(6): 606-613.

Usia, T., A. H. Banskota, Y. Tezuka, K. Midorikawa, K. Matsushige and S. Kadota (2002). "Constituents of Chinese propolis and their antiproliferative activities." J Nat Prod **65**(5): 673-676.
