# Supplementary material for: Broad-spectrum pharmacological activity of Australian propolis and metabolomic-driven identification of marker metabolites of propolis samples from three continents
Source: Royal Society of Chemistry journal article supplement (doi:10.1039/d1fo00127b), 2021-01-01
Supplement: d1fo00127b2.xlsx [file d1fo00127b2.xlsx]

## Sheet: LCMS DATA
RT_MASS identifier	Neutral mass (Da)	Manuscript Compound No	RT (min)	m/z	CCS (A^2)	Highest Mean	Lowest Mean	MSn	Database identifier	Accepted Description	Compound Class	Adducts	Formula	Mass Error (ppm)	Isotope Similarity	Compound Link	SMILES	-
4.22_311.1258m/z	312.133	1	4.22148	311.126	182.242	Australian/AP-2	CP-1	311(1.66), 255	CRC Number: RBK87-M	3',4',5-trihydroxy-3-prenyloxy-(E)-stilbene	Stilbene	M-H	C19H20O4	-9.85556	-	http://dnp.chemnetbase.com/faces/styx/Charon.xhtml?HZJ7%2BxLuU%2F8VnlYxZlo2JCW%2FyO4vU%2FguBWmbWFuT8brLHL7KHGO8puCHOfEtVrnsny1kvT5SChs%3D	OC1=CC(/C=C/C2=CC(O)=C(O)C=C2)=C(C/C=C(C)/C)C(O)=C1	-
5.95_380.1945n	380.194	2	5.94802	379.189	213.255	Australian/AP-2	BP-1	379(-5.94), 261(M+H2O-H), 335, 321, 293, 281, 269, 267	CRC Number: RZW65-Y	(E)-2,6-bis(3-methyl-2-buten-1-yl)-3,3',5,5'-tetrahydroxystilbene	Stilbene	M-H2O-H, M-H	C24H28O4	-11.3266	-	http://dnp.chemnetbase.com/faces/styx/Charon.xhtml?HZJ7%2BxLuU%2F8VnlYxZlo2JCW%2FyO4vU%2FguBWmbWFuT8bpvLvB4Yprep0mAor40cfphV7s4IM2BoPA%3D	OC1=CC(O)=C(C/C=C(C)/C)C(/C=C/C2=CC(O)=CC(O)=C2)=C1C/C=C(C)/C	-
6.94_424.1860n	424.186	3	6.93922	423.179	212.491	Australian/AP-2	CP-1	847(2M-H), 461,(M+K-2H), 445(M+Na-2H), 423(M-H), 405(M-H2O-H), 301, 287, 243,135(-6.3)	PubchemCiID:639465	Propolin C/D/F	Prenylated flavanone	M-H2O-H, M-H, M+Na-2H, M+K-2H, 2M-H	C25H28O6	-6.02	-	https://pubchem.ncbi.nlm.nih.gov/compound/639465	O=C1C2=C(O)C(C/C=C(C)/CC/C=C(C)/C)=C(O)C=C2O[C@H](C3=CC=C(O)C(O)=C3)C1	-
7.76_407.1835m/z	408.191	4	7.75903	407.183	209.184	Australian/AP-2	BP-1	407(3.94), 313, 301, ,287, 243, 219, 119	PubChemCID 6475921	8-geranyl naringenin(bonannione A,sophoraflavanone A)	Prenylated flavanone	M-H	C25H28O5	-7.1	-	https://pubchem.ncbi.nlm.nih.gov/compound/6475921#section=InChI	C/C(C)=C\CCC(\C)=C\Cc1c(O)cc2O[C@@H](CC(=O)c2c1O)c1ccc(O)cc1	-
9.49_490.2922n	490.292	5	9.48512	471.274	215.363	Australian/AP-2	BP-1	-	-	Unidentified	-	M-H2O-H, M-H	C28H42O7	-1.8	-	-	-	-	-	-	-	-	-	-	-	-	-	-	-	-	-	-	-	-	-	-	-	-	-	-	-	-	-	-	-	-	-	-	-
5.96_342.1442n	342.144	6	5.95515	341.136	183.396	Australian/AP-1	BP-1	341, 323(-6.4), 313, 311, 307, 295, 285, 239	AllCCS00095262	Prenyl-tetrahydroxy-dihydrochalcone	Flavonoids; prenylated-dihydrochalcone	M-H2O-H, M-H	C20H22O5	-7.37	-	http://allccs.zhulab.cn/database/detail?ID=AllCCS00095262	CC(C)=CCC1=C(O)C(O)=CC(CCC(=O)C2=C(O)C=C(O)C=C2)=C1	-	-	-	-	-	-	-	-	-	-	-	-	-	-	-	-	-	-	-	-	-	-	-	-	-	-	-	-	-	-	-	-
6.30_140.0607n	140.061	7	6.29722	325.141	180.095	Australian/AP-1	CP-1	-	-	Unidentified	-	M+FA-H, 2M+FA-H	-	-	-	-	-	-	-	-	-	-	-	-	-	-	-	-	-	-	-	-	-	-	-	-	-	-	-	-	-	-	-	-	-	-	-	-	-
8.73_471.3450m/z	472.352	8	8.72888	471.345	224.206	Australian/AP-1	CP-1	471(6.18), 235, 207	CRC Number: JXD97-U	hydroxymangiferolic acid/hydroxyisomangiferolic acid (3,23-Dihydroxycycloart-24-en-26-oic acid)	Triterpene	M-H	C30H48O4	-6.26	93.3736	http://dnp.chemnetbase.com/faces/styx/Charon.xhtml?HZJ7%2BxLuU%2F8VnlYxZlo2JCW%2FyO4vU%2FguBWmbWFuT8brov0gcrngQnBsKrYirDSsFLwSzr1ffAlk%3D	CC(CC(C=C(C)C(=O)O)O)C1CCC2(C1(CCC34C2CCC5C3(C4)CCC(C5(C)C)O)C)C	-	-	-	-	-	-	-	-	-	-	-	-	-	-	-	-	-	-	-	-	-	-	-	-	-	-	-	-	-	-	-	-
3.00_515.1200m/z	516.127	9	3.0022	515.12	209.54	BP-1	CP-1	353(+0.001), 353, 191, 179, 173, 155, 137, 135, 327(-0.47)	HMDBoo29280	Di-O-caffeoylquinic acid	Phenylpropanoid- Quinic acid derivative	M-H	C25H24O12	1.06	90.38	https://hmdb.ca/metabolites/HMDB0029280	O[C@@H]1C[C@@](O)(C(O)=O)C[C@@H](OC(/C=C/C2=CC=C(O)C(O)=C2)=O)[C@@H]1OC(/C=C/C3=CC(O)=C(O)C=C3)=O	-	-	-	-	-	-	-	-	-	-	-	-	-	-	-	-	-	-	-	-	-	-	-	-	-	-	-	-	-	-	-	-
3.36_678.1593n	678.159	10	3.35855	677.152	243.213	BP-1	CP-1	715, 699, 677, 537, 519, 515, 335, 179, 173	PubChem CID:6440783	Tri-O-caffeoylquinic acid	Phenylpropanoid- Quinic acid derivative	M-H, M+Na-2H, M+K-2H	C34H30O15	1.22	93.18	https://pubchem.ncbi.nlm.nih.gov/compound/3_4_5-Tricaffeoylquinic-acid	C1C(C(C(CC1(C(=O)O)O)OC(=O)C=CC2=CC(=C(C=C2)O)O)OC(=O)C=CC3=CC(=C(C=C3)O)O)OC(=O)C=CC4=CC(=C(C=C4)O)O	-	-	-	-		-	-	-	-	-	-	-	-	-	-	-	-	-	-	-	-	-	-	-	-	-	-	-	-	-	-	-
6.34_299.1630m/z	300.17	11	6.34007	299.163	186.195	BP-1	CP-1	299, 255(-0.54) , 187	CRC Number: NHT93-C	ArtepillinC	Prenylated hydroxycinnanic acid derivative	M-H	C19H24O3	-7.38474	-	http://dnp.chemnetbase.com/faces/styx/Charon.xhtml?HZJ7%2BxLuU%2F8VnlYxZlo2JCW%2FyO4vU%2FguBWmbWFuT8bqTI3zAeiC4wBPxntoGY7jfrkP7y4Qcf1E%3D	OC(/C=C/C1=CC(C/C=C(C)/C)=C(O)C(C/C=C(C)/C)=C1)=O	-	-	-	-		-	-	-	-	-	-	-	-	-	-	-	-	-	-	-	-	-	-	-	-	-	-	-	-	-	-	-
4.19_301.0699m/z	302.077	12	4.18578	301.07	167.824	BP-1	CP-1	301, 151	PubchemCID:586387	Dihydrokaempferide	Flavonoids-Flavanonol	M-H	C16H14O6	-6.24091	-	https://pubchem.ncbi.nlm.nih.gov/compound/Dihydrokaempferide	O=C1C2=C(O)C=C(O)C=C2O[C@H](C3=CC=C(OC)C=C3)[C@H]1O	-	-	-	-	-	-	-	-	-	-	-	-	-	-	-	-	-	-	-	-	-	-	-	-	-	-	-	-	-	-	-	-
4.68_270.1595n	270.16	13	4.67808	315.158	187.61	BP-1	CP-1	315, 269, 253, 241, 239, 237,	LMST02010020	3β-hydroxy-estra-5,7,9-trien-17-one	Steroid derivative	M-H, M+FA-H	C18H22O2	-9.25371	-	https://www.lipidmaps.org/data/LMSDRecord.php?LMID=LMST02010020	C1C2C3=CC[C@]4(C)C(=O)CC[C@@]4([H])C3=CC=C2C[C@H](O)C1	-	-	-	-	-	-	-	-	-	-	-	-	-	-	-	-	-	-	-	-	-	-	-	-	-	-	-	-	-	-	-	-
5.06_314.1502n	314.15	14	5.05608	313.143	185.839	BP-1	AP-2	313(0.24), 285, 269	HMDB38013	Gibberellin A120	C19 Gibberellin 6- carboxylic acids	M-H, M+K-2H	C19H22O4	-5	95.53	https://hmdb.ca/metabolites/HMDB0038013	[H][C@@]12CC[C@@H]3C[C@]1(CC3=C)[C@@H](C(O)=O)[C@]1([H])[C@@]3(C)CC=C[C@@]21OC3=O	-	-		-	-	-	-	-	-	-	-	-	-	-	-	-	-	-	-	-	-	-	-	-	-	-	-	-	-	-	-	-
5.09_394.1390n	394.139	15	5.09178	393.132	189.691	BP-1	AP-2	431, 415, 393(4.67), 377, 349, 347, 307, 281, 247, 185, 163, 145	DNP-CRC Number: HPZ13-Y	(E)-3-{2,3-dihydro-2[2-[(E)-p-coumaroyloxy]-1-methylethyl]-5-benzofuranyl}-2-propenoic acid	Phenylpropanoid-Hydroxycinnamic acid esters-Coumaric acid esters	M-H, M+Na-2H, M+K-2H	C23H22O6	-6.69	-	http://dnp.chemnetbase.com/faces/styx/Charon.xhtml?HZJ7%2BxLuU%2F8VnlYxZlo2JCW%2FyO4vU%2FguBWmbWFuT8brOOEEn9wxXsR6SlLFVSW14YP%2BlCOfMbXE%3D	O=C(OCC(C1CC(C=C(/C=C/C(O)=O)C=C2)=C2O1)C)/C=C/C3=CC=C(O)C=C3	-	-		-	-	-	-	-	-	-	-	-	-	-	-	-	-	-	-	-	-	-	-	-	-	-	-	-	-	-	-	-
5.13_284.0298m/z	263.055	16	5.12748	284.03	151.577	BP-1	AP-2	-	-	Unidentified	-	M+Na-2H	C13H11O6	-1.77441	-	-	-	-	-	-	-	-	-	-	-	-	-	-	-	-	-	-	-	-	-	-	-	-	-	-	-	-	-	-	-	-	-	-	-
5.14_264.0836n	264.084	17	5.14177	299.053	166.031	BP-1	AP-2	284(7.9), 228	HMDB34681	3-Hydroxy-4-butanolide	Carbohydrates and carbohydrate conjugates	M+Cl, M+FA-H	C10H16O8	-3.6	-	https://hmdb.ca/metabolites/HMDB0034681	OCC1OC(OC2COC(=O)C2)C(O)C(O)C1O	-	-	-	-	-	-	-	-	-	-	-	-	-	-	-	-	-	-	-	-	-	-	-	-	-	-	-	-	-	-	-	-
5.30_142.0402n	142.04	18	5.29888	329.066	170.879	BP-1	AP-2	-	-	Unidentified	-	M-H, M+Cl, M+FA-H, 2M+FA-H	-	-	-	-	-	-	-	-	-	-	-	-	-	-	-	-	-	-	-	-	-	-	-	-	-	-	-	-	-	-	-	-	-	-	-	-	-
5.52_315.1573m/z	316.165	19	5.51955	315.157	185.79	BP-1	CP-1	315, 253, 211, 201(-7.8)	CRC Number: FYH72-S	(E)-3-(2,3-dihydro-2-(1-hydroxy-1-methylethenyl)-7-prenyl-5-benzofuranyl]-2-propenoic acid	Benzofuran	M-H	C19H24O4	-9.17	-	http://dnp.chemnetbase.com/faces/styx/Charon.xhtml?HZJ7%2BxLuU%2F8VnlYxZlo2JCW%2FyO4vU%2FguBWmbWFuT8brwtesR4FKCePjQK97tTzqURA6LOccgWOs%3D	OC(/C=C/C1=CC2=C(OC(C(C)(O)C)C2)C(C/C=C(C)/C)=C1)=O	-	-	-	-	-	-	-	-	-	-	-	-	-	-	-	-	-	-	-	-	-	-	-	-	-	-	-	-	-	-	-	-
7.04_562.2556n	562.256	20	7.03848	597.213	247.341	BP-1	AP-1	-	PubChemCID: 4971, Metabolic profiling CCS library	Protoporphyrin	Porphyrins	M-H, M+Cl	C34H34N4O4	-4.28	94.39	https://pubchem.ncbi.nlm.nih.gov/compound/4971	-	-	-	-	-	-	-	-	-	-	-	-	-	-	-	-	-	-	-	-	-	-	-	-	-	-	-	-	-	-	-	-	-
9.50_613.3172m/z	-	21	9.4994	613.317	292.083	BP-1	CP-1	613(6.29), 555, 510,	LMST01080094	Spirostenyl-hexoside	Steroidal glycoside	M+K-2H	C33H52O8	4.04	85.21	https://lipidmaps.org/data/LMSDRecord.php?LMID=LMST01080094	CC1CCC2(C(C3C(O2)CC4C3(CCC5C4CC=C6C5(CCC(C6)OC7C(C(C(C(O7)CO)O)O)O)C)C)C)OC1	-	-	-	-	-	-	-	-	-	-	-	-	-	-	-	-	-	-	-	-	-	-	-	-	-	-	-	-	-	-	-	-
10.10_525.3209m/z	543.332	22	10.105	525.321	227.078	BP-1	AP-2	525(3.26),487, 333, 219	HMDB0061699	GPC(20:4)	Lipid-Glycerophoshphocholines	M-H2O-H	C28H51NO7P+	-2.82114	94	https://hmdb.ca/metabolites/HMDB0061699	CCCCCC=CCC=CCC=CCC=CCCCC(=O)OC(CO)COP(=O)([O-])OCC[N+](C)(C)C	-	-	-	-	-	-	-	-	-	-	-	-	-	-	-	-	-	-	-	-	-	-	-	-	-	-	-	-	-	-	-	-
10.38_514.3308n	514.331	23	10.3839	513.324	227.212	BP-1	AP-2	535, 513, 429, 400, 385, 357, 343, 331, 315	CSID469914	Spirost-5-en-3,11-diyl diacetate	Triterpene	M-H, M+Na-2H	C31H46O6	2.72199	97.73	http://www.chemspider.com/Chemical-Structure.469914.html	CC(=O)OC1CC2=CCC3C(C(OC(C)=O)CC4(C)C5C(CC34)OC3(CCC(C)CO3)C5C)C2(C)CC1	-	-	-		-	-	-	-	-	-	-	-	-	-	-	-	-	-	-	-	-	-	-	-	-	-	-	-	-	-	-	-
10.65_528.3449n	528.345	24	10.6474	527.338	232.325	BP-1	AP-2	549, 527, 414, 399(-1.96), 398	HMDB0035335	(24E)-3alpha-Acetoxy-15alpha,22S-dihydroxylanosta-7,9(11),24-trien-26-oic acid	Triterpene	M-H, M+Na-2H	C32H48O6	-0.41	95.77	https://hmdb.ca/metabolites/HMDB0035335	CC(C(O)C\C=C(/C)C(O)=O)C1CC(O)C2(C)C3=CCC4C(C)(C)C(CCC4(C)C3=CCC12C)OC(C)=O	-	-	-	-	-	-	-	-	-	-	-	-	-	-	-	-	-	-	-	-	-	-	-	-	-	-	-	-	-	-	-	-
4.87_478.1247n	478.125	25	4.87112	477.117	211.744	CP-1	BP-1	910, 477, 431, 403, 389, 367(-1.16), 321, 295, 293, 281, 269, 227	PubchemCID 44424373	5-hydroxy-3-(4-hydroxy-3,5-dimethoxy-benzoyl)-2-(3-hydroxy-4-methoxy-phenyl)-6-methoxy-inden-1-one	Cinnamic acid derivative	M-H, 2M-H	C26H22O9	-3.41202	-	https://pubchem.ncbi.nlm.nih.gov/compound/44424373	COC1=C(C=C(C=C1)C2=C(C3=CC(=C(C=C3C2=O)OC)O)C(=O)C4=CC(=C(C(=C4)OC)O)OC)O		-	-	-	-	-	-	-	-	-	-	-	-	-	-	-	-	-	-	-	-	-	-	-	-	-	-	-	-	-	-	-
4.97_463.1334m/z	442.159	26	4.9711	463.133	208.369	CP-1	AP-2	463, 411, 353(-2.4), 307, 299	CRC OJS86	Dimeric coniferyl acetate (10,11-diacetyl dehydrodiconiferyl alcohol)	2-arylbenzofuran flavonoids	M+Na-2H	C24H26O8	-9.2	-	https://pubchem.ncbi.nlm.nih.gov/compound/44584272	CC(OC/C=C/C1=CC2=C(C(OC)=C1)O[C@@H](C3=CC=C(O)C(OC)=C3)[C@@H]2COC(C)=O)=O	-	-	-	-	-	-	-	-	-	-	-	-	-	-	-	-	-	-	-	-	-	-	-	-	-	-	-	-	-	-	-	-
5.13_270.0494n	270.049	27	5.12748	269.044	153.82	CP-1	BP-1	269(4.28), 151	PubChem CID:5281616	Trihydroxyflavone (Galangin/apigenin)	Flavonoids-Flavonols/flavone	M-H2O-H, M-H	C15H10O5	-12.6	-	https://pubchem.ncbi.nlm.nih.gov/compound/Galangin	C1=CC=C(C=C1)C2=C(C(=O)C3=C(C=C(C=C3O2)O)O)O	-	-	-	-	-	-	-	-	-	-	-	-	-	-	-	-	-	-	-	-	-	-	-	-	-	-	-	-	-	-	-	-
7.37_337.1057m/z	356.124	28	7.37412	337.106	178.02	CP-1	BP-1	337, 237, 225	PubChemCID636686	Pinobanksin 3-pentanoate	Flavonoids-Flavanonol	M-H2O-H	C20H20O6	-5.23578	92.2845	https://pubchem.ncbi.nlm.nih.gov/compound/636686	OC1=CC2=C(C([C@H](OC([C@@H](C)CC)=O)[C@@H](C3=CC=CC=C3)O2)=O)C(O)=C1	-	-	-	-	-	-	-	-	-	-	-	-	-	-	-	-	-	-	-	-	-	-	-	-	-	-	-	-	-	-	-	-
6.92_355.1185m/z	356.126	29	6.9178	355.118	183.122	CP-1	BP-1	355, 253(-2.1), 185	PubChemCID636686	Pinobanksin 3-pentanoate	Flavonoids-Flavanonol	M-H	C20H20O6	-0.714868	-5.23578	https://pubchem.ncbi.nlm.nih.gov/compound/636686	OC1=CC2=C(C([C@H](OC([C@@H](C)CC)=O)[C@@H](C3=CC=CC=C3)O2)=O)C(O)=C1	-	-	-	-	-	-	-	-	-	-	-	-	-	-	-	-	-	-	-	-	-	-	-	-	-	-	-	-	-	-	-	-
7.43_369.1107m/z	370.118	30	7.43125	369.111	191.906	CP-1	BP-1	369(-4.69), 181	CRC Number: LOL69-M	6-cinnamylchrysin	Flavonoids-flavones	M-H	C24H18O4	-6.87861	81.9531	http://dnp.chemnetbase.com/faces/styx/Charon.xhtml?HZJ7%2BxLuU%2F8VnlYxZlo2JCW%2FyO4vU%2FguBWmbWFuT8brHQ7jJxm8A0kLZ076x%2BXvJQUI15ebAGlo%3D	OC1=CC2=C(C(C=C(C3=CC=CC=C3)O2)=O)C(O)=C1C/C=C/C4=CC=CC=C4	-	-	-	-	-	-	-	-	-	-	-	-	-	-	-	-	-	-	-	-	-	-	-	-	-	-	-	-	-	-	-	-
7.45_385.1056m/z	364.131	31	7.44553	385.106	189.822	CP-1	AP-1	237	LMPK12111585	Dimethoxy-6'',6''-dimethylpyranoflavone	Flavonoids-flavones	M+Na-2H	C22H20O5	-0.510116	93.2781	http://nonlinear.com/redirect/outbound?p=lipidmaps&param=LMPK12111585	CC1(C=CC2=C3C(=CC(=C2O1)OC)C(=O)C(=C(O3)C4=CC=CC=C4)OC)C	-	-	-	-	-	-	-	-	-	-	-	-	-	-	-	-	-	-	-	-	-	-	-	-	-	-	-	-	-	-	-	-
7.57_385.1061m/z	348.157	32	7.56622	385.106	191.624	CP-1	AP-1	367	LMPR0104170036	Gibberellin A29/A1/A34/A36/A58/A60	Diterpeneoid-C19 Gibberellin 6- carboxylic acids	M+K-2H	C19H24O6	0.473079	85.9217	http://nonlinear.com/redirect/outbound?p=lipidmaps&param=LMPR0104170036	CC12CC(CC3(C1C(C45C3CCC(C4)(C(=C)C5)O)C(=O)O)OC2=O)O	-	-	-	-	-	-	-	-	-	-	-	-	-	-	-	-	-	-	-	-	-	-	-	-	-	-	-	-	-	-	-	-
7.65_350.1516n	350.152	33	7.65192	385.106	195.224	CP-1	BP-1	-	-	Unidentified	-	M+Na-2H, M+Cl	C22H22O4	-0.689645			-	-	-	-	-	-	-	-	-	-	-	-	-	-	-	-	-	-	-	-	-	-	-	-	-	-	-	-	-	-	-	-	-
9.51_496.3161n	496.316	34	9.51298	533.288	239.268	CP-1	BP-1	447, 337, 254, 253	LMGP04070002	PG(P-18:0/0:0)	Glycerophospholipids	M-H, M+Cl, M+K-2H	C24H49O8P	-0.779978	96.9068	http://nonlinear.com/redirect/outbound?p=lipidmaps&param=LMGP04070002	PG(P-18:0/0:0)	-	-	-	-	-	-	-	-	-	-	-	-	-	-	-	-	-	-	-	-	-	-	-	-	-	-	-	-	-	-	-	-
9.68_512.3120n	512.312	35	9.67723	547.269	246.102	CP-1	AP-2	533, 511, 269, 286, 211, 335	LMGP04050009	PG(18:0/0:0)	Glycerophospholipids	M-H, M+Na-2H, M+Cl	C24H49O9P	1.2109	95.2249	http://nonlinear.com/redirect/outbound?p=lipidmaps&param=LMGP04050009	CCCCCCCCCCCCCCCCCC(=O)OCC(COP(=O)(O)OCC(CO)O)O	-	-	-	-	-	-	-	-	-	-	-	-	-	-	-	-	-	-	-	-	-	-	-	-	-	-	-	-	-	-	-	-
3.27_327.1215m/z	306.147	36	3.26572	327.122	174.577	AP-2	BP-1	327(-0.46), 239, 211, 167, 146	HMDB0134974	3,4-dihydroxy-2-(4-hydroxy-3,7-dimethylocta-2,6-dien-1-yl)benzoic acid	Hydroxybenzoic acid derivative-Monocyclic monoterpene	M+Na-2H	C17H22O5	0.482153	96.2043	http://nonlinear.com/redirect/outbound?p=hmdb&param=HMDB0134974	CC(C)=CCC(O)C(C)=CCC1=C(C=CC(O)=C1O)C(O)=O	-	-	-	-	-	-	-	-	-	-	-	-	-	-	-	-	-	-	-	-	-	-	-	-	-	-	-	-	-	-	-	-
3.33_357.1320m/z	322.163	37	3.32998	357.132	179.454	AP-2	BP-1	357, 342, 255, 241	LMFA13010043	Butyl 3-O-beta-D-glucopyranosyl-butanoate	Fatty acyl glycoside	M+Cl	C14H26O8	-0.605224	95.5691	http://nonlinear.com/redirect/outbound?p=lipidmaps&param=LMFA13010043	[C@H]1(O)C(O)C(O)[C@H](OC(CC(=O)OCCCC)C)OC1CO	-	-	-	-	-	-	-	-	-	-	-	-	-	-	-	-	-	-	-	-	-	-	-	-	-	-	-	-	-	-	-	-
4.09_440.1799n	440.18	38	4.08553	439.173	215.804	AP-2	CP-1	461, 439, 369, 305, 303, 247, 231, 135(100%)	AllCCS-CFMID	Abyssinoflavanone VI	Flavonoids-Flavans	M-H, M+Na-2H	C25H28O7	-8.193	92.3353	http://allccs.zhulab.cn/database/detail?ID=AllCCS00120417	C12C(O)=CC(O)=CC=1OC(C1C3CC(O)C(C)(C)OC=3C3OC(C)(C)CCC=3C=1)CC2=O	-	-	-	-	-	-	-	-	-	-	-	-	-	-	-	-	-	-	-	-	-	-	-	-	-	-	-	-	-	-	-	-
4.48_315.0846m/z	294.3	39	4.47857	315.085	171.176	AP-2	BP-1	315, 300, 299, 282, 281, 271, 269, 243, 190, 150, 134, 79	HMDB0039825	Cyclocalopin F	Furanopyrans	M+Na-2H	C15H18O6	-1.23752	90.16	http://nonlinear.com/redirect/outbound?p=hmdb&param=HMDB0039825	CC1COC(=O)C2OC3(C)OC4CC3(C12)C(O)C(=O)C4=C	-	-	-	-	-	-	-	-	-	-	-	-	-	-	-	-	-	-	-	-	-	-	-	-	-	-	-	-	-	-	-	-
4.66_380.1964n	380.196	40	4.6564	379.189	202.515	AP-2	CP-1	379 (M-H), 361 (M-H2O-H), 417(M+K-2H), 325, 311,295, 283, 281, 269, 267, 259, 255, 249, 241, 185, 183, 161,	PubChem CID:78078055	(E)-2,4-bis(3-methyl-2-buten-1-yl)-3,3',4',5-tetrahydroxystilbene	Stilbene	M-H2O-H, M-H, M+K-2H	C24H28O4	-6.20728	-	https://pubchem.ncbi.nlm.nih.gov/compound/78078055	Oc1cc(O)c(C\C=C(/C)C)c(/C=C/c2cc(O)cc(O)c2)c1C\C=C(/C)C	-	-	-	-	-	-	-	-	-	-	-	-	-	-	-	-	-	-	-	-	-	-	-	-	-	-	-	-	-	-	-	-
4.76_669.2691m/z	632.32	41	4.76377	669.269	262.325	AP-2	CP-1	669(3.47), 627, 582	HMDB33207	Coagulin R -hexoside	Steroid lactone glycoside	M+K-2H	C34H48O11	1.31	91.1592	https://hmdb.ca/metabolites/HMDB0033207	CC1=C(C)C(=O)OC(C1)C1(C)OC23CCC1(O)C2(C)CCC1C3CC=C2CC(CC(=O)C12C)OC1OC(CO)C(O)C(O)C1O	-	-	-	-	-	-	-	-	-	-	-	-	-	-	-	-	-	-	-	-	-	-	-	-	-	-	-	-	-	-	-	-
4.79_290.1188n	290.119	42	4.7852	639.256	255.65	AP-2	BP-1	-	-	Unidentified	-	M-H2O-H, 2M+Hac-H	-	-	-	-	-	-	-	-	-	-	-	-	-	-	-	-	-	-	-	-	-	-	-	-	-	-	-	-	-	-	-	-	-	-	-	-	-
5.00_241.0471m/z	-	43	4.99965	241.047	279.199	AP-2	BP-1	-	-	Unidentified	-	-	-	-	-	-	-	-	-	-	-	-	-	-	-	-	-	-	-	-	-	-	-	-	-	-	-	-	-	-	-	-	-	-	-	-	-	-	-
5.63_918.3939n	918.394	44	5.62667	963.395	320.244	AP-2	CP-1	-	-	Unidentified	-	M-H, M+FA-H	C57H58O11/C64H54O6	4.37|2.03	-	-	-	-	-	-	-	-	-	-	-	-	-	-	-	-	-	-	-	-	-	-	-	-	-	-	-	-	-	-	-	-	-	-	-
5.68_652.2715n	652.271	45	5.67665	651.264	262.47	AP-2	CP-1	-	-	Unidentified	-	M-H, M+Na-2H	C32H44O14	-2.46747	-	-	-		-	-	-	-	-	-	-	-	-	-	-	-	-	-	-	-	-	-	-	-	-	-	-	-	-	-	-	-	-	-	-
6.00_712.3252n	712.325	46	5.998	749.297	280.66	AP-2	CP-1	-	-	Unidentified	-	M+Na-2H, M+K-2H	C42H48O10	0.63	-	-	-	-	-	-	-	-	-	-	-	-	-	-	-	-	-	-	-	-	-	-	-	-	-	-	-	-	-	-	-	-	-	-	-
6.07_348.1591n	348.159	47	6.06872	369.134	193.709	AP-2	BP-1	-	-	Unidentified	-	M+Na-2H, M+K-2H	C19H24O6	5.32	-	-	-	-	-	-	-	-	-	-	-	-	-	-	-	-	-	-	-	-	-	-	-	-	-	-	-	-	-	-	-	-	-	-	-
6.54_666.2774m/z		48	6.53932	666.277	265.801	AP-2	BP-1	-	-	Unidentified	-	-	-	-	-	-	-	-	-	-	-	-	-	-	-	-	-	-	-	-	-	-	-	-	-	-	-	-	-	-	-	-	-	-	-	-	-	-	-
6.59_344.2306n	344.219	49	6.5893	379.189	209.68	AP-2	CP-1	379, 310, 292, 279,267, 255, 241, 197	PubChem CID:91696352	Methyl 4,6-O-(10-undecenylidene)hexopyranoside	Pyranodioxins	M+Cl, M+FA-H, 2M+FA-H	C18H32O6	-1.71	-	https://pubchem.ncbi.nlm.nih.gov/compound/91696352	COC1C(C(C2C(O1)COC(O2)CCCCCCCCC=C)O)O	-	-	-	-	-	-	-	-	-	-	-	-	-	-	-	-	-	-	-	-	-	-	-	-	-	-	-	-	-	-	-	-
6.62_720.3285n	720.328	50	6.61787	719.321	279.156	AP-2	BP-1	-	-	Unidentified	-	M-H2O-H, M-H, M+Na-2H	C44H48O9	-1.85	-	-	-	-	-	-	-	-	-	-	-	-	-	-	-	-	-	-	-	-	-	-	-	-	-	-	-	-	-	-	-	-	-	-	-
6.94_720.3287n	720.329	51	6.93922	719.321	284.298	AP-2	CP-1	-	-	Unidentified	-	M-H, M+Na-2H	C44H48O9	-1.57	-	https://www.chemcalc.org/mf-finder?integer=false&ionizations=&maxUnsaturation=999&minUnsaturation=0&nonInteger=false&precision=500&range=C0-100%20H0-200%20N0-20%20O0-20&targetMass=720.3287	-	-	-	-	-	-	-	-	-	-	-	-	-	-	-	-	-	-	-	-	-	-	-	-	-	-	-	-	-	-	-	-	-
6.98_408.1906n	408.191	52	6.98207	407.183	202.035	AP-2	BP-1	443, 407,295, 219, 187, 177	LMPK12140281	3’,8-diprenylnaringenin	Prenylated flavanone	M-H, M+Cl	C25H28O5	-7.52	93.2797	https://hmdb.ca/metabolites/HMDB0029532	CC(C)=CCC1=CC(=CC=C1O)C1OC2=C(C=CC(O)=C2CC=C(C)C)C(=O)C1O	-	-	-	-	-	-	-	-	-	-	-	-	-	-	-	-	-	-	-	-	-	-	-	-	-	-	-	-	-	-	-	-
7.21_666.2815n	666.282	53	7.20987	665.274	270.98	AP-2	CP-1	-	-	Unidentified	-	M-H, M+Na-2H, M+Cl, M+FA-H	C40H42O9	-	-	Chemcalc	-	-	-	-	-	-	-	-	-	-	-	-	-	-	-	-	-	-	-	-	-	-	-	-	-	-	-	-	-	-	-	-	-
9.04_491.2414m/z	492.249	54	9.04238	491.241	230.996	AP-2	BP-1	491(-3.69), 459, 405	CRC Number: LVR64-I	Propolin G/Solophenol A/Nymphaeol C (Geranyl-tetrahydroxy-prenylflavanone)	Prenylated flavanone	M-H	C30H36O6	-5.11397	96.7517	http://dnp.chemnetbase.com/faces/styx/Charon.xhtml?HZJ7%2BxLuU%2F8VnlYxZlo2JCW%2FyO4vU%2FguBWmbWFuT8boR3RGANNNsgTgg%2F7DFzLmxDw0r43RHzzw%3D	OC1=C(C/C=C(C)/C)C(O)=C(C(C[C@@H](C2=CC=C(O)C(O)=C2C/C=C(C)/CC/C=C(C)/C)O3)=O)C3=C1	-	-	-	-	-	-	-	-	-	-	-	-	-	-	-	-	-	-	-	-	-	-	-	-	-	-	-	-	-	-	-	-
9.21_492.2487n	492.249	55	9.20662	491.241	229.237	AP-2	BP-1	957(2M-H),513(M=Na-2H), 491(M-H), 323,301, 287,235, 203	CRC Number: LVR64-I	Propolin G/Solophenol A/Nymphaeol C (Geranyl-tetrahydroxy-prenylflavanone)	Prenylated flavanone	M-H, M+Na-2H, 2M-H	C30H36O6	-4.96748	96.7517	http://dnp.chemnetbase.com/faces/styx/Charon.xhtml?HZJ7%2BxLuU%2F8VnlYxZlo2JCW%2FyO4vU%2FguBWmbWFuT8boR3RGANNNsgTgg%2F7DFzLmxDw0r43RHzzw%3D	O=C1C2=C(O)C=C(O)C(C/C=C(C)/C)=C2O[C@H](C3=CC=C(O)C(O)=C3C/C=C(C)/CC/C=C(C)/C)C1	-	-	-	-	-	-	-	-	-	-	-	-	-	-	-	-	-	-	-	-	-	-	-	-	-	-	-	-	-	-	-	-
9.69_455.3493m/z	456.357	56	9.69152	455.349	217.347	AP-2	BP-1	455(0.95)	CRC Number: QBP25-G	Mangiferolic acid/isomangiferolic acid/12-Hydroxy-3,4-secocycloarta-4(28),24-dien-3-oic acid;	Triterpene	M-H	C30H48O3	-8.32675	95.4257	http://dnp.chemnetbase.com/faces/styx/Charon.xhtml?HZJ7%2BxLuU%2F8VnlYxZlo2JCW%2FyO4vU%2FguBWmbWFuT8bqTpSsqPscER7o6OCD3mefWBY3PZ7659I4%3D	C/C(C)=C\CCC(C)C1CCC2(C)C3CCC(C(=C)C)C4(CCC(=O)O)CC34CC(O)C12C or CC(CCC=C(C)C(=O)O)C1CCC2(C1(CCC34C2CCC5C3(C4)CCC(C5(C)C)O)C)C	-	-	-	-	-	-	-	-	-	-	-	-	-	-	-	-	-	-	-	-	-	-	-	-	-	-	-	-	-	-	-	-
3.47_375.1429m/z	330.145	57	3.46567	375.143	186.382	AP-1	CP-1	301, 281, 269, 261, 231	CSID:ID9511419	(7S,8S,7'R,8'R)-3,3',4'-trihydroxy-4-methoxy-7,7'-epoxylignan	Lignan	M+HCOO-	C19H22O5	-6.05791		https://www.sciencedirect.com/science/article/abs/pii/S0278691511001967	C[C@H]1[C@H](C)[C@@H](C2=CC=C(O)C(O)=C2)O[C@@H]1C3=CC(O)=C(OC)C=C3	-	-	-	-	-	-	-	-	-	-	-	-	-	-	-	-	-	-	-	-	-	-	-	-	-	-	-	-	-	-	-	-
3.59_360.1532n	360.153	58	3.58635	359.148	186.67	AP-1	CP-1	359(4.70), 341, 325, 283, 271, 241, 227, 187	AllCCS-CFMID	Casegravol isovaleric acid	Phenylpropanoid-Coumarin	M-H2O-H, M-H	C20H24O6	-11.38	-	http://allccs.zhulab.cn/database/detail?ID=AllCCS00032569	COC1=C(\C=C\C(C)(O)COC(=O)CC(C)C)C2=C(C=CC(=O)O2)C=C1	-	-	-	-	-	-	-	-	-	-	-	-	-	-	-	-	-	-	-	-	-	-	-	-	-	-	-	-	-	-	-	-
4.47_358.1387n	358.139	59	4.47143	357.131	183.084	AP-1	BP-1	357(0.45), 339, 281	CSID:ID23283151	Pinoresinol/3-hydroxy-3-(4-hydroxyphenyl)-1-[2,4,6-trihydroxy-3-(3-methylbut-2-en-1-yl)phenyl]propan-1-one	Lignan	M-H2O-H, M-H	C20H22O6	-8.2	-	https://www.chemspider.com/Chemical-Structure.23283151.html?rid=e55ccb38-304e-42c0-9e2a-9267f8962496	[H][C@]12[C@H](C3=CC(OC)=C(O)C=C3)OC[C@@]1([H])[C@H](C4=CC(OC)=C(O)C=C4)OC2	-	-	-	-	-	-	-	-	-	-	-	-	-	-	-	-	-	-	-	-	-	-	-	-	-	-	-	-	-	-	-	-
5.06_357.1308m/z	312.133	60	5.06322	357.131	181.27	AP-1	BP-1	357(3.189), 311, 281, 269, 267, 239, 227, 163	CRC Number: QWS32-M	3,5,3',4'-Tetetrahydroxy-2-prenyl-(E)-stilbene	Stilbene	M+FA-H	C19H20O4	-11.3001	84.4582	http://dnp.chemnetbase.com/faces/styx/Charon.xhtml?HZJ7%2BxLuU%2F8VnlYxZlo2JCW%2FyO4vU%2FguBWmbWFuT8bp8I86JBdARfbkNL4%2FkdsZF2SSMViUI7N0%3D	OC1=CC(/C=C/C2=CC(O)=C(O)C=C2)=C(C/C=C(C)/C)C(O)=C1	-	-	-	-	-	-	-	-	-	-	-	-	-	-	-	-	-	-	-	-	-	-	-	-	-	-	-	-	-	-	-	-
5.75_144.1032n	144.103	61	5.74807	333.205	185.379	AP-1	CP-1	-	-	Unidentified	-	2M+FA-H, 3M-H	-	-	-	-	-	-	-	-	-	-	-	-	-	-	-	-	-	-	-	-	-	-	-	-	-	-	-	-	-	-	-	-	-	-	-	-	-
6.15_490.3635n	490.363	62	6.14727	489.357	225.737	AP-1	CP-1	489(3.45), 471, 235	HMDB0034525	Barringtogenol C-like	Triterpene	M-H2O-H, M-H	C30H50O5	-4.78244	88.5256	http://nonlinear.com/redirect/outbound?p=hmdb&param=HMDB0034525	CC1(C)CC2C3=CCC4C5(C)CCC(O)C(C)(C)C5CCC4(C)C3(C)CC(O)C2(CO)C(O)C1O	-	-	-	-	-	-	-	-	-	-	-	-	-	-	-	-	-	-	-	-	-	-	-	-	-	-	-	-	-	-	-	-
6.46_489.3562m/z	508.375	63	6.46147	489.356	225.737	AP-1	CP-1	489(0.61), 149	LMST01031065	6beta-acetoxy-24-methylcholestan-3beta,5alpha,22R,24-tetrol	Steroid	M-H2O-H	C30H52O6	4.6	95.3705	https://pubchem.ncbi.nlm.nih.gov/compound/126048	CC(C)C(C)(CC(C(C)C1CCC2C1(CCC3C2CC(C4(C3(CCC(C4)O)C)O)OC(=O)C)C)O)O	-	-	-	-	-	-	-	-	-	-	-	-	-	-	-	-	-	-	-	-	-	-	-	-	-	-	-	-	-	-	-	-
7.12_334.2115n	334.212	64	7.12418	315.194	183.968	AP-1	CP-1	339, 315(-1.17), 189	PubchemCID:6436877	Agathic acid	Diterpeneoid	M-H2O-H, M+Cl	C20H30O4	-8.63	-	https://pubchem.ncbi.nlm.nih.gov/compound/6436877	C=C1CCC2[C@](C(O)=O)(C)CCC[C@]2(C)[C@H]1CC/C(C)=C/C(O)=O
8.96_471.3458m/z	472.353	65	8.96453	471.346	222.439	AP-1	CP-1	471(2.15),203	CRC Number: JXD97-U	hydroxymangiferolic acid/hydroxyisomangiferolic acid (3,23-Dihydroxycycloart-24-en-26-oic acid)	Triterpene	M-H	C30H48O4	-4.57	93.3736	http://dnp.chemnetbase.com/faces/styx/Charon.xhtml?HZJ7%2BxLuU%2F8VnlYxZlo2JCW%2FyO4vU%2FguBWmbWFuT8brov0gcrngQnBsKrYirDSsFLwSzr1ffAlk%3D	CC(CC(C=C(C)C(=O)O)O)C1CCC2(C1(CCC34C2CCC5C3(C4)CCC(C5(C)C)O)C)C	-	-	-	-	-	-	-	-	-	-	-	-	-	-	-	-	-	-	-	-	-	-	-	-	-	-	-	-	-	-	-	-
9.21_471.3448m/z	472.352	66	9.21377	471.345	220.672	AP-1	CP-1	471(1.3), 235	CRC Number: JXD97-U	hydroxymangiferolic acid/hydroxyisomangiferolic acid (3,23-Dihydroxycycloart-24-en-26-oic acid)	Triterpene	M-H	C30H48O4	-6.82	93.3736	http://dnp.chemnetbase.com/faces/styx/Charon.xhtml?HZJ7%2BxLuU%2F8VnlYxZlo2JCW%2FyO4vU%2FguBWmbWFuT8brov0gcrngQnBsKrYirDSsFLwSzr1ffAlk%3D	O[C@@H]1CC[C@@]2(C3)[C@](CC[C@]4([H])[C@@]23CC[C@@]5(C)[C@@]4(C)CC[C@@H]5[C@@H](C(O)C/C=C(C)/C(O)=O)C)([H])C1(C)C	-	-	-	-	-	-	-	-	-	-	-	-	-	-	-	-	-	-	-	-	-	-	-	-	-	-	-	-	-	-	-	-
9.69_468.2762n	468.276	67	9.69152	489.226	227.501	AP-1	CP-1	-	-	Unidentified	-	M-H2O-H, M+Na-2H	C25H40O8	3.88	-	-	-	-	-	-	-	-	-	-	-	-	-	-	-	-	-	-	-	-	-	-	-	-	-	-	-	-	-	-	-	-	-	-	-
-	-	-	-	-	Color Code	Meaning		-	-	-	-	-	-	-	-	-	-	-	-	-	-	-	-	-	-	-	-	-	-	-	-	-	-	-	-	-	-	-	-	-	-	-	-	-	-	-	-	-	-
-	-	-	-	-	-	Highest mean in BP-1		-	-	-	-	-	-	-	-	-	-	-	-	-	-	-	-	-	-	-	-	-	-	-	-	-	-	-	-	-	-	-	-	-	-	-	-	-	-	-	-	-	-
-	-	-	-	-	-	Highest mean in Australian samples		-	-	-	-	-	-	-	-	-	-	-	-	-	-	-	-	-	-	-	-	-	-	-	-	-	-	-	-	-	-	-	-	-	-	-	-	-	-	-	-	-	-
-	-	-	-	-	-	Highest mean in AP-2		-	-	-	-	-	-	-	-	-	-	-	-	-	-	-	-	-	-	-	-	-	-	-	-	-	-	-	-	-	-	-	-	-	-	-	-	-	-	-	-	-	-
-	-	-	-	-	-	Highest mean in AP-1		-	-	-	-	-	-	-	-	-	-	-	-	-	-	-	-	-	-	-	-	-	-	-	-	-	-	-	-	-	-	-	-	-	-	-	-	-	-	-	-	-	-
-	-	-	-	-	-	Highest mean inCP-1		-	-	-	-	-	-	-	-	-	-	-	-	-	-	-	-	-	-	-	-	-	-	-	-	-	-	-	-	-	-	-	-	-	-	-	-	-	-	-	-	-	-
-	-	-	-	-	-	-	-	-	-	-	-	-	-	-	-	-	-	-	-	-	-	-	-	-	-	-	-	-	-	-	-	-	-	-	-	-	-	-	-	-	-	-	-	-	-	-	-	-	-
-	-	-	-	-	-	-	-	-	-	-	-	-	-	-	-	-	-	-	-	-	-	-	-	-	-	-	-	-	-	-	-	-	-	-	-	-	-	-	-	-	-	-	-	-	-	-	-	-	-
		-	-	-	-	-	* bold adduct are the most abundant where m/z (Da) and CCS of the most abundant adduct were reported, ** Bold fragment is 100% intensity fragment with mass error in ppm.				-	-	-		-	-	-	-	-	-	-	-	-	-	-	-	-	-	-	-	-	-	-	-	-	-	-	-	-	-	-	-	-	-	-	-	-	-	-
-	-	-	-	-	-	-	-	-	-	-	-	-	-		-	-	-	-	-	-	-	-	-	-	-	-	-	-	-	-	-	-	-	-	-	-	-	-	-	-	-	-	-	-	-	-	-	-	-
-	-	-	-	-	-	-	-	-	-	-	-	-	-	-	-	-	-	-	-	-	-	-	-	-	-	-	-	-	-	-	-	-	-	-	-	-	-	-	-	-	-	-	-	-	-	-	-	-	-
-	-	-	-	-	-	-	-	-	-	-	-	-	-	-	-	-	-	-	-	-	-	-	-	-	-	-	-	-	-	-	-	-	-	-	-	-	-	-	-	-	-	-	-	-	-	-	-	-	-
-	-	-	-	-	-	-	-	-	-	-	-	-	-	-	-	-	-	-	-	-	-	-	-	-	-	-	-	-	-	-	-	-	-	-	-	-	-	-	-	-	-	-	-	-	-	-	-	-	-
-	-	-	-	-	-	-	-	-	-	-	-	-	-	-	-	-	-	-	-	-	-	-	-	-	-	-	-	-	-	-	-	-	-	-	-	-	-	-	-	-	-	-	-	-	-	-	-	-	-
-	-	-	-	-	-	-	-	-	-	-	-	-	-	-	-	-	-	-	-	-	-	-	-	-	-	-	-	-	-	-	-	-	-	-	-	-	-	-	-	-	-	-	-	-	-	-	-	-	-
-	-	-	-	-	-	-	-	-	-	-	-	-	-	-	-	-	-	-	-	-	-	-	-	-	-	-	-	-	-	-	-	-	-	-	-	-	-	-	-	-	-	-	-	-	-	-	-	-	-
-	-	-	-	-	-	-	-	-	-	-	-	-	-	-	-	-	-	-	-	-	-	-	-	-	-	-	-	-	-	-	-	-	-	-	-	-	-	-	-	-	-	-	-	-	-	-	-	-	-
-	-	-	-	-	-	-	-	-	-	-	-	-	-	-	-	-	-	-	-	-	-	-	-	-	-	-	-	-	-	-	-	-	-	-	-	-	-	-	-	-	-	-	-	-	-	-	-	-	-
-	-	-	-	-	-	-	-	-	-	-	-	-	-	-	-	-	-	-	-	-	-	-	-	-	-	-	-	-	-	-	-	-	-	-	-	-	-	-	-	-	-	-	-	-	-	-	-	-	-
-	-	-	-	-	-	-	-	-	-	-	-	-	-	-	-	-	-	-	-	-	-	-	-	-	-	-	-	-	-	-	-	-	-	-	-	-	-	-	-	-	-	-	-	-	-	-	-	-	-
-	-	-	-	-	-	-	-	-	-	-	-	-	-	-	-	-	-	-	-	-	-	-	-	-	-	-	-	-	-	-	-	-	-	-	-	-	-	-	-	-	-	-	-	-	-	-	-	-	-
-	-	-	-	-	-	-	-	-	-	-	-	-	-	-	-	-	-	-	-	-	-	-	-	-	-	-	-	-	-	-	-	-	-	-	-	-	-	-	-	-	-	-	-	-	-	-	-	-	-
-	-	-	-	-	-	-	-	-	-	-	-	-	-	-	-	-	-	-	-	-	-	-	-	-	-	-	-	-	-	-	-	-	-	-	-	-	-	-	-	-	-	-	-	-	-	-	-	-	-
-	-	-	-	-	-	-	-	-	-	-	-	-	-	-	-	-	-	-	-	-	-	-	-	-	-	-	-	-	-	-	-	-	-	-	-	-	-	-	-	-	-	-	-	-	-	-	-	-	-
-	-	-	-	-	-	-	-	-	-	-	-	-	-	-	-	-	-	-	-	-	-	-	-	-	-	-	-	-	-	-	-	-	-	-	-	-	-	-	-	-	-	-	-	-	-	-	-	-	-
-	-	-	-	-	-	-	-	-	-	-	-	-	-	-	-	-	-	-	-	-	-	-	-	-	-	-	-	-	-	-	-	-	-	-	-	-	-	-	-	-	-	-	-	-	-	-	-	-	-
-	-	-	-	-	-	-	-	-	-	-	-	-	-	-	-	-	-	-	-	-	-	-	-	-	-	-	-	-	-	-	-	-	-	-	-	-	-	-	-	-	-	-	-	-	-	-	-	-	-
-	-	-	-	-	-	-	-	-	-	-	-	-	-	-	-	-	-	-	-	-	-	-	-	-	-	-	-	-	-	-	-	-	-	-	-	-	-	-	-	-	-	-	-	-	-	-	-	-	-
-	-	-	-	-	-	-	-	-	-	-	-	-	-	-	-	-	-	-	-	-	-	-	-	-	-	-	-	-	-	-	-	-	-	-	-	-	-	-	-	-	-	-	-	-	-	-	-	-	-
-	-	-	-	-	-	-	-	-	-	-	-	-	-	-	-	-	-	-	-	-	-	-	-	-	-	-	-	-	-	-	-	-	-	-	-	-	-	-	-	-	-	-	-	-	-	-	-	-	-
-	-	-	-	-	-	-	-	-	-	-	-	-	-	-	-	-	-	-	-	-	-	-	-	-	-	-	-	-	-	-	-	-	-	-	-	-	-	-	-	-	-	-	-	-	-	-	-	-	-
-	-	-	-	-	-	-	-	-	-	-	-	-	-	-	-	-	-	-	-	-	-	-	-	-	-	-	-	-	-	-	-	-	-	-	-	-	-	-	-	-	-	-	-	-	-	-	-	-	-
-	-	-	-	-	-	-	-	-	-	-	-	-	-	-	-	-	-	-	-	-	-	-	-	-	-	-	-	-	-	-	-	-	-	-	-	-	-	-	-	-	-	-	-	-	-	-	-	-	-
-	-	-	-	-	-	-	-	-	-	-	-	-	-	-	-	-	-	-	-	-	-	-	-	-	-	-	-	-	-	-	-	-	-	-	-	-	-	-	-	-	-	-	-	-	-	-	-	-	-
-	-	-	-	-	-	-	-	-	-	-	-	-	-	-	-	-	-	-	-	-	-	-	-	-	-	-	-	-	-	-	-	-	-	-	-	-	-	-	-	-	-	-	-	-	-	-	-	-	-
-	-	-	-	-	-	-	-	-	-	-	-	-	-	-	-	-	-	-	-	-	-	-	-	-	-	-	-	-	-	-	-	-	-	-	-	-	-	-	-	-	-	-	-	-	-	-	-	-	-
-	-	-	-	-	-	-	-	-	-	-	-	-	-	-	-	-	-	-	-	-	-	-	-	-	-	-	-	-	-	-	-	-	-	-	-	-	-	-	-	-	-	-	-	-	-	-	-	-	-
-	-	-	-	-	-	-	-	-	-	-	-	-	-	-	-	-	-	-	-	-	-	-	-	-	-	-	-	-	-	-	-	-	-	-	-	-	-	-	-	-	-	-	-	-	-	-	-	-	-
-	-	-	-	-	-	-	-	-	-	-	-	-	-	-	-	-	-	-	-	-	-	-	-	-	-	-	-	-	-	-	-	-	-	-	-	-	-	-	-	-	-	-	-	-	-	-	-	-	-
-	-	-	-	-	-	-	-	-	-	-	-	-	-	-	-	-	-	-	-	-	-	-	-	-	-	-	-	-	-	-	-	-	-	-	-	-	-	-	-	-	-	-	-	-	-	-	-	-	-
-	-	-	-	-	-	-	-	-	-	-	-	-	-	-	-	-	-	-	-	-	-	-	-	-	-	-	-	-	-	-	-	-	-	-	-	-	-	-	-	-	-	-	-	-	-	-	-	-	-
-	-	-	-	-	-	-	-	-	-	-	-	-	-	-	-	-	-	-	-	-	-	-	-	-	-	-	-	-	-	-	-	-	-	-	-	-	-	-	-	-	-	-	-	-	-	-	-	-	-
-	-	-	-	-	-	-	-	-	-	-	-	-	-	-	-	-	-	-	-	-	-	-	-	-	-	-	-	-	-	-	-	-	-	-	-	-	-	-	-	-	-	-	-	-	-	-	-	-	-
-	-	-	-	-	-	-	-	-	-	-	-	-	-	-	-	-	-	-	-	-	-	-	-	-	-	-	-	-	-	-	-	-	-	-	-	-	-	-	-	-	-	-	-	-	-	-	-	-	-
-	-	-	-	-	-	-	-	-	-	-	-	-	-	-	-	-	-	-	-	-	-	-	-	-	-	-	-	-	-	-	-	-	-	-	-	-	-	-	-	-	-	-	-	-	-	-	-	-	-
-	-	-	-	-	-	-	-	-	-	-	-	-	-	-	-	-	-	-	-	-	-	-	-	-	-	-	-	-	-	-	-	-	-	-	-	-	-	-	-	-	-	-	-	-	-	-	-	-	-
-	-	-	-	-	-	-	-	-	-	-	-	-	-	-	-	-	-	-	-	-	-	-	-	-	-	-	-	-	-	-	-	-	-	-	-	-	-	-	-	-	-	-	-	-	-	-	-	-	-
-	-	-	-	-	-	-	-	-	-	-	-	-	-	-	-	-	-	-	-	-	-	-	-	-	-	-	-	-	-	-	-	-	-	-	-	-	-	-	-	-	-	-	-	-	-	-	-	-	-
-	-	-	-	-	-	-	-	-	-	-	-	-	-	-	-	-	-	-	-	-	-	-	-	-	-	-	-	-	-	-	-	-	-	-	-	-	-	-	-	-	-	-	-	-	-	-	-	-	-
-	-	-	-	-	-	-	-	-	-	-	-	-	-	-	-	-	-	-	-	-	-	-	-	-	-	-	-	-	-	-	-	-	-	-	-	-	-	-	-	-	-	-	-	-	-	-	-	-	-
-	-	-	-	-	-	-	-	-	-	-	-	-	-	-	-	-	-	-	-	-	-	-	-	-	-	-	-	-	-	-	-	-	-	-	-	-	-	-	-	-	-	-	-	-	-	-	-	-	-
-	-	-	-	-	-	-	-	-	-	-	-	-	-	-	-	-	-	-	-	-	-	-	-	-	-	-	-	-	-	-	-	-	-	-	-	-	-	-	-	-	-	-	-	-	-	-	-	-	-
-	-	-	-	-	-	-	-	-	-	-	-	-	-	-	-	-	-	-	-	-	-	-	-	-	-	-	-	-	-	-	-	-	-	-	-	-	-	-	-	-	-	-	-	-	-	-	-	-	-
-	-	-	-	-	-	-	-	-	-	-	-	-	-	-	-	-
[truncated: 94 more columns]
